# Supplementary material for: Comparison and evaluation of methods for generating differentially expressed gene lists from microarray data
Source: PubMed Central journal article supplement (PMC1544358; doi:10.1186/1471-2105-7-359), 2006-07-26
Supplement: 1471-2105-7-359-S1.pdf [file 1471-2105-7-359-S1.pdf]

ALL.1, where n = 5

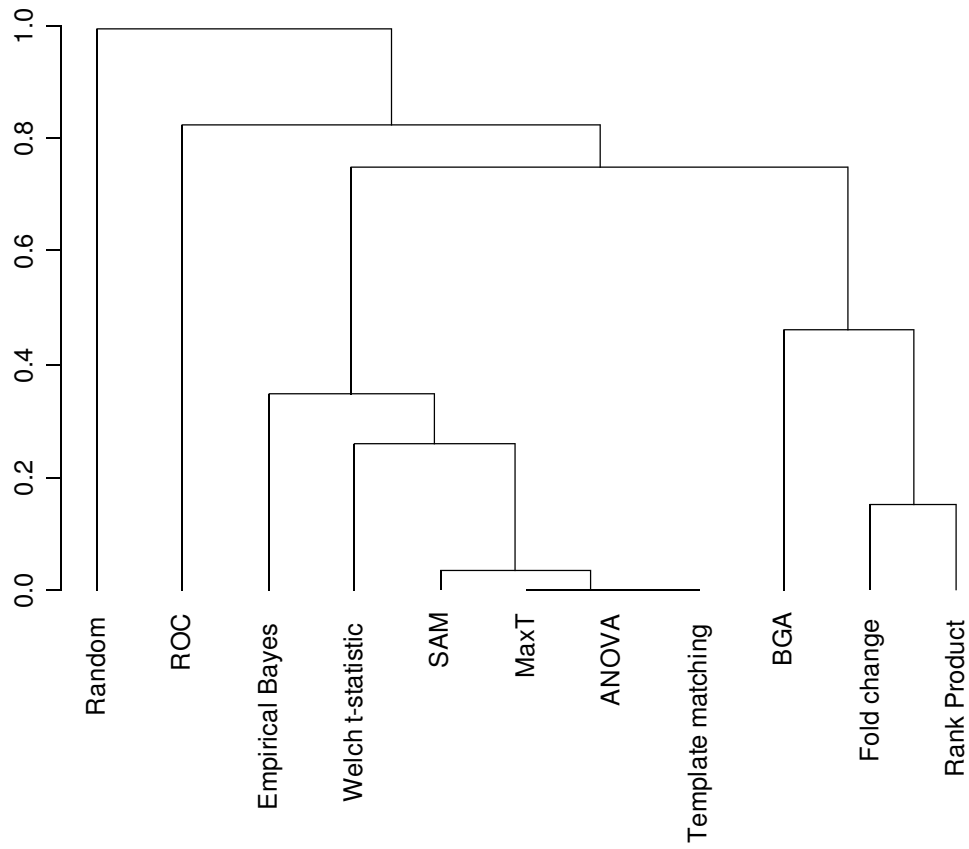

|                   | BGA  | SAM  | ANOVA | Template matching | Welch t-statistic | Fold change | Empirical Bayes | MaxT | ROC  | Rank Product |
|-------------------|------|------|-------|-------------------|-------------------|-------------|-----------------|------|------|--------------|
| BGA               | /    | 36   | 35.1  | 35.1              | 31.5              | 71          | 42.7            | 35.1 | 18.1 | 68.8         |
| SAM               | 36   | /    | 98.2  | 98.2              | 84.8              | 40.4        | 81.3            | 98.2 | 35   | 43.9         |
| ANOVA             | 35.1 | 98.2 | /     | 100               | 85.3              | 39.3        | 79.6            | 100  | 35.1 | 42.8         |
| Template matching | 35.1 | 98.2 | 100   | /                 | 85.3              | 39.3        | 79.6            | 100  | 35.1 | 42.8         |
| Welch t-statistic | 31.5 | 84.8 | 85.3  | 85.3              | /                 | 36.1        | 74.3            | 85.3 | 34.7 | 38.9         |
| Fold change       | 71   | 40.4 | 39.3  | 39.3              | 36.1              | /           | 48.3            | 39.3 | 19.9 | 91.9         |
| Empirical Bayes   | 42.7 | 81.3 | 79.6  | 79.6              | 74.3              | 48.3        | /               | 79.6 | 34   | 52.8         |
| MaxT              | 35.1 | 98.2 | 100   | 100               | 85.3              | 39.3        | 79.6            | /    | 35.1 | 42.8         |
| ROC               | 18.1 | 35   | 35.1  | 35.1              | 34.7              | 19.9        | 34              | 35.1 | /    | 21.2         |
| Rank Product      | 68.8 | 43.9 | 42.8  | 42.8              | 38.9              | 91.9        | 52.8            | 42.8 | 21.2 | /            |
| Random            | 0.6  | 1.4  | 1.4   | 1.4               | 1.3               | 0.5         | 1.1             | 1.4  | 0.8  | 0.7          |

ALL.2, where n = 5

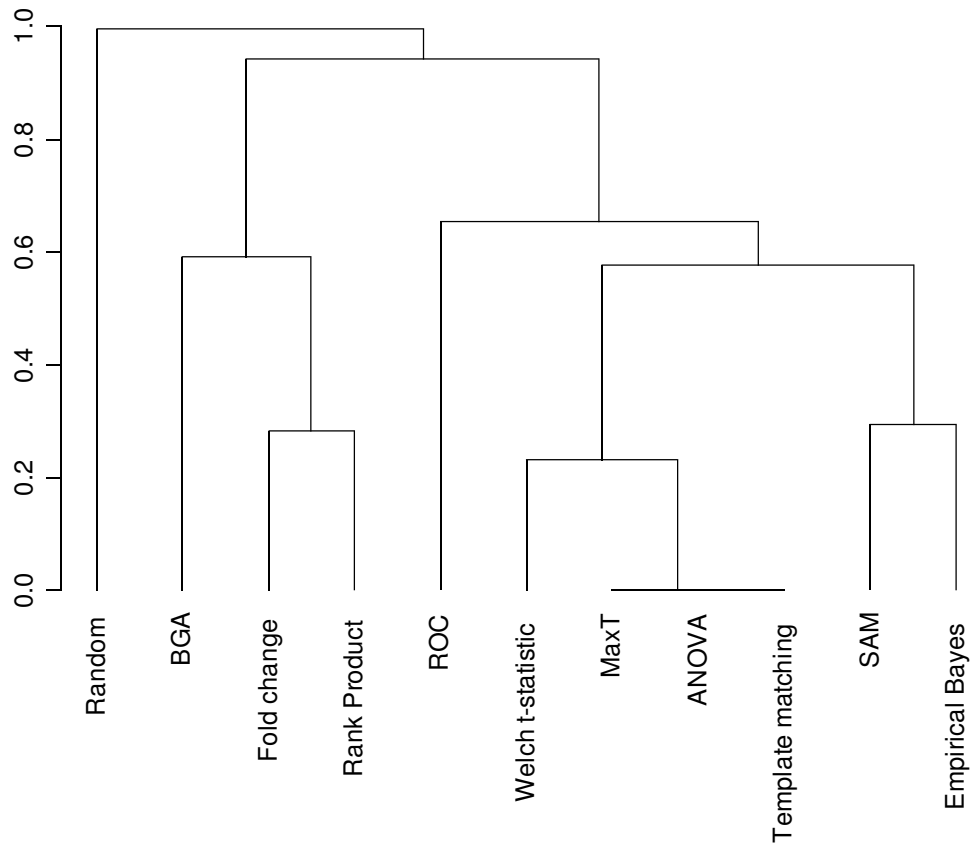

|                   | BGA  | SAM  | ANOVA | Template matching | Welch t-statistic | Fold change | Empirical Bayes | MaxT | ROC  | Rank Product |
|-------------------|------|------|-------|-------------------|-------------------|-------------|-----------------|------|------|--------------|
| BGA               | /    | 19.4 | 8.2   | 8.2               | 6.5               | 60.7        | 17.6            | 8.2  | 8.2  | 55.2         |
| SAM               | 19.4 | /    | 63    | 63                | 60.5              | 19.8        | 82.7            | 63   | 45.5 | 20.1         |
| ANOVA             | 8.2  | 63   | /     | 100               | 87                | 7.9         | 57.2            | 100  | 55.5 | 8.1          |
| Template matching | 8.2  | 63   | 100   | /                 | 87                | 7.9         | 57.2            | 100  | 55.5 | 8.1          |
| Welch t-statistic | 6.5  | 60.5 | 87    | 87                | /                 | 6.5         | 54.8            | 87   | 51.8 | 6.9          |
| Fold change       | 60.7 | 19.8 | 7.9   | 7.9               | 6.5               | /           | 17.4            | 7.9  | 7.4  | 83.5         |
| Empirical Bayes   | 17.6 | 82.7 | 57.2  | 57.2              | 54.8              | 17.4        | /               | 57.2 | 43.3 | 17.6         |
| MaxT              | 8.2  | 63   | 100   | 100               | 87                | 7.9         | 57.2            | /    | 55.5 | 8.1          |
| ROC               | 8.2  | 45.5 | 55.5  | 55.5              | 51.8              | 7.4         | 43.3            | 55.5 | /    | 7.6          |
| Rank Product      | 55.2 | 20.1 | 8.1   | 8.1               | 6.9               | 83.5        | 17.6            | 8.1  | 7.6  | /            |
| Random            | 0.8  | 0.8  | 0.6   | 0.6               | 0.8               | 0.6         | 0.9             | 0.6  | 0.5  | 0.6          |

ALL.3, where n = 5

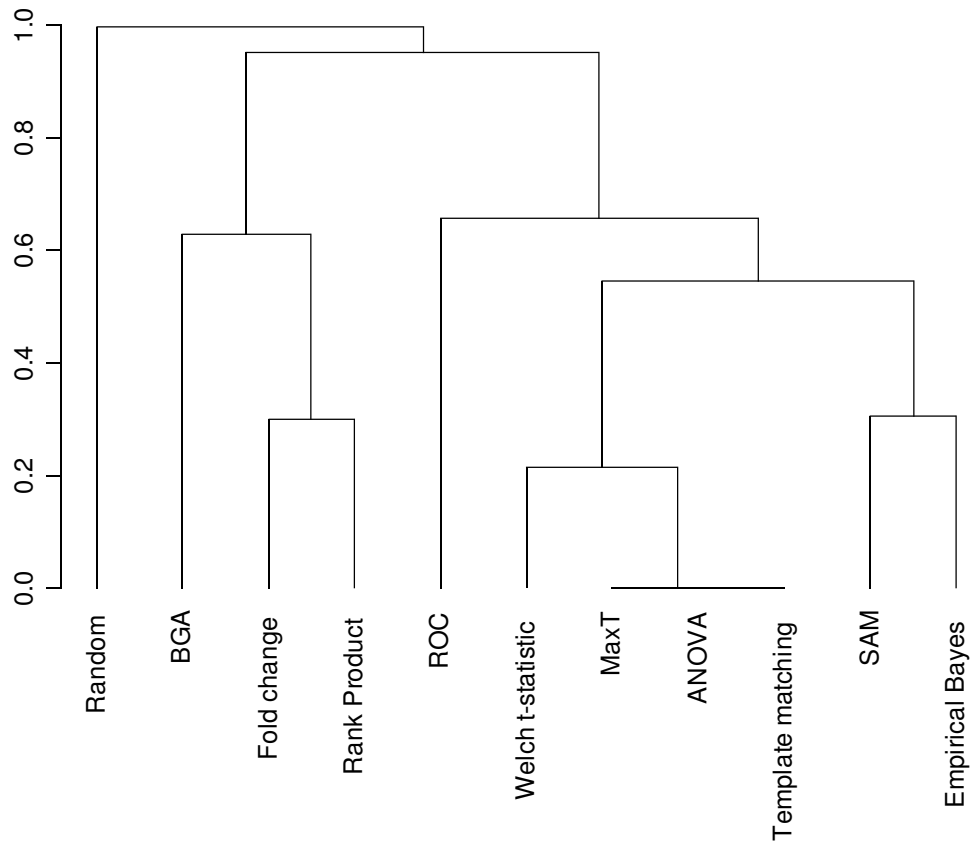

|                   | BGA  | SAM  | ANOVA | Template matching | Welch t-statistic | Fold change | Empirical Bayes | MaxT | ROC  | Rank Product |
|-------------------|------|------|-------|-------------------|-------------------|-------------|-----------------|------|------|--------------|
| BGA               | /    | 13.4 | 5.6   | 5.6               | 5                 | 57.8        | 16.4            | 5.6  | 5.8  | 50.2         |
| SAM               | 13.4 | /    | 69.7  | 69.7              | 67.4              | 17          | 81.9            | 69.7 | 46.7 | 16           |
| ANOVA             | 5.6  | 69.7 | /     | 100               | 88                | 7.6         | 55.7            | 100  | 55.5 | 7.2          |
| Template matching | 5.6  | 69.7 | 100   | /                 | 88                | 7.6         | 55.7            | 100  | 55.5 | 7.2          |
| Welch t-statistic | 5    | 67.4 | 88    | 88                | /                 | 7.5         | 54.6            | 88   | 51.7 | 7.2          |
| Fold change       | 57.8 | 17   | 7.6   | 7.6               | 7.5               | /           | 20.2            | 7.6  | 6.6  | 82.3         |
| Empirical Bayes   | 16.4 | 81.9 | 55.7  | 55.7              | 54.6              | 20.2        | /               | 55.7 | 40.1 | 18.9         |
| MaxT              | 5.6  | 69.7 | 100   | 100               | 88                | 7.6         | 55.7            | /    | 55.5 | 7.2          |
| ROC               | 5.8  | 46.7 | 55.5  | 55.5              | 51.7              | 6.6         | 40.1            | 55.5 | /    | 6.2          |
| Rank Product      | 50.2 | 16   | 7.2   | 7.2               | 7.2               | 82.3        | 18.9            | 7.2  | 6.2  | /            |
| Random            | 0.8  | 0.6  | 0.4   | 0.4               | 0.5               | 0.8         | 0.5             | 0.4  | 0.8  | 0.8          |

ALL.4, where n = 5

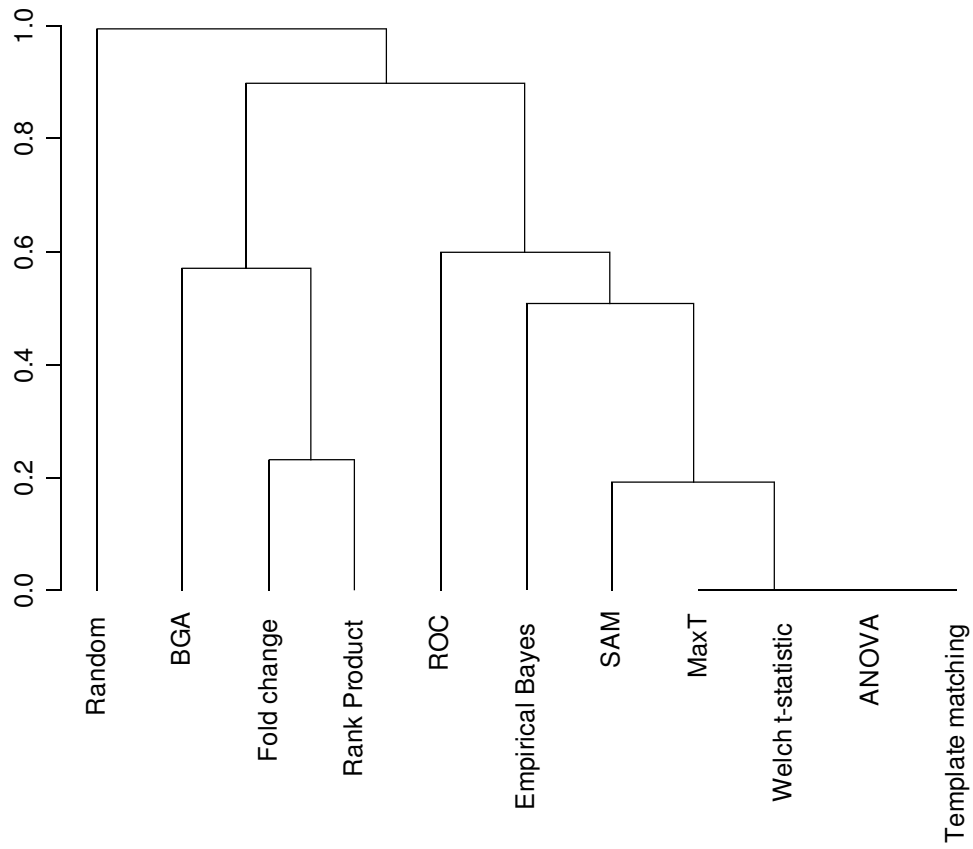

|                   | BGA  | SAM  | ANOVA | Template matching | Welch t-statistic | Fold change | Empirical Bayes | MaxT | ROC  | Rank Product |
|-------------------|------|------|-------|-------------------|-------------------|-------------|-----------------|------|------|--------------|
| BGA               | /    | 17.4 | 13.7  | 13.7              | 13.7              | 61.4        | 24.8            | 13.7 | 13.9 | 58.8         |
| SAM               | 17.4 | /    | 89.4  | 89.4              | 89.4              | 21.5        | 74.2            | 89.4 | 57.3 | 21.5         |
| ANOVA             | 13.7 | 89.4 | /     | 100               | 100               | 17.6        | 63.6            | 100  | 59.2 | 17.8         |
| Template matching | 13.7 | 89.4 | 100   | /                 | 100               | 17.6        | 63.6            | 100  | 59.2 | 17.8         |
| Welch t-statistic | 13.7 | 89.4 | 100   | 100               | /                 | 17.6        | 63.6            | 100  | 59.2 | 17.8         |
| Fold change       | 61.4 | 21.5 | 17.6  | 17.6              | 17.6              | /           | 31.4            | 17.6 | 14.6 | 87           |
| Empirical Bayes   | 24.8 | 74.2 | 63.6  | 63.6              | 63.6              | 31.4        | /               | 63.6 | 47.9 | 31           |
| MaxT              | 13.7 | 89.4 | 100   | 100               | 100               | 17.6        | 63.6            | /    | 59.2 | 17.8         |
| ROC               | 13.9 | 57.3 | 59.2  | 59.2              | 59.2              | 14.6        | 47.9            | 59.2 | /    | 14.4         |
| Rank Product      | 58.8 | 21.5 | 17.8  | 17.8              | 17.8              | 87          | 31              | 17.8 | 14.4 | /            |
| Random            | 0.6  | 0.7  | 0.6   | 0.6               | 0.6               | 0.9         | 0.9             | 0.6  | 1.3  | 0.9          |

### Colon, where n = 5

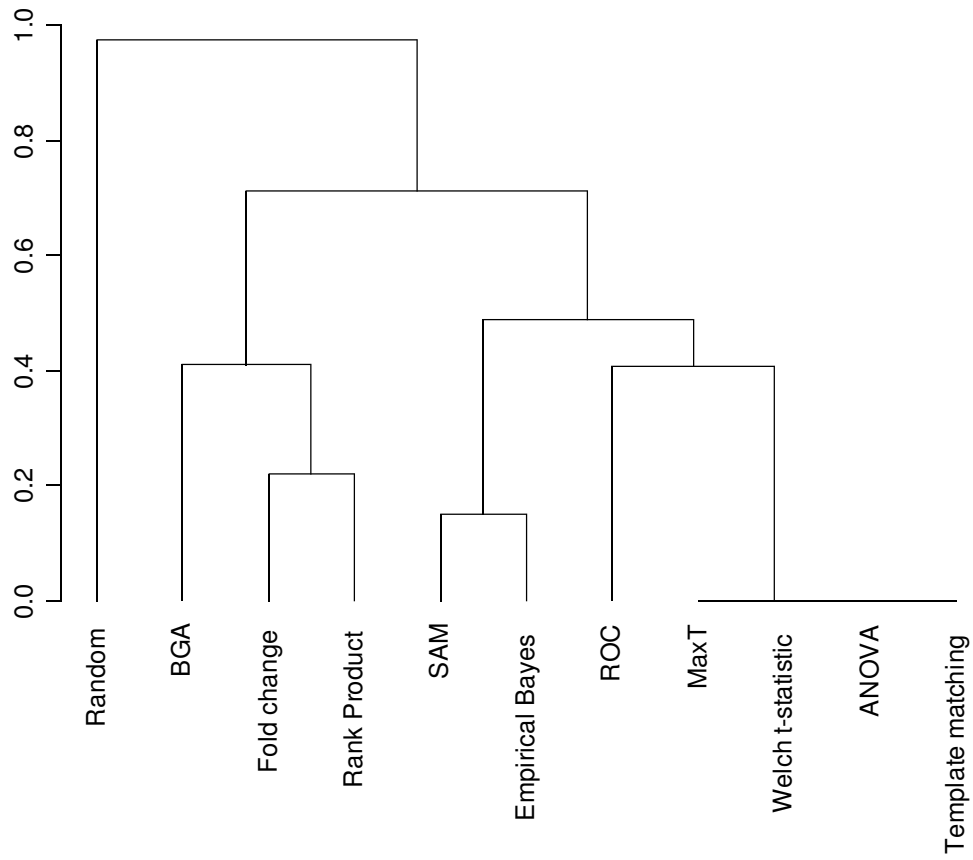

|                   | BGA  | SAM  | ANOVA | Template matching | Welch t-statistic | Fold change | Empirical Bayes | MaxT | ROC  | Rank Product |
|-------------------|------|------|-------|-------------------|-------------------|-------------|-----------------|------|------|--------------|
| BGA               | /    | 57.7 | 37.7  | 37.7              | 37.7              | 75.7        | 59.2            | 37.7 | 37.6 | 72.5         |
| SAM               | 57.7 | /    | 71    | 71                | 71                | 65.1        | 91.8            | 71   | 63   | 56.4         |
| ANOVA             | 37.7 | 71   | /     | 100               | 100               | 40.4        | 67.1            | 100  | 74.3 | 33.9         |
| Template matching | 37.7 | 71   | 100   | /                 | 100               | 40.4        | 67.1            | 100  | 74.3 | 33.9         |
| Welch t-statistic | 37.7 | 71   | 100   | 100               | /                 | 40.4        | 67.1            | 100  | 74.3 | 33.9         |
| Fold change       | 75.7 | 65.1 | 40.4  | 40.4              | 40.4              | /           | 66.5            | 40.4 | 39.1 | 87.5         |
| Empirical Bayes   | 59.2 | 91.8 | 67.1  | 67.1              | 67.1              | 66.5        | /               | 67.1 | 60.6 | 57.1         |
| MaxT              | 37.7 | 71   | 100   | 100               | 100               | 40.4        | 67.1            | /    | 74.3 | 33.9         |
| ROC               | 37.6 | 63   | 74.3  | 74.3              | 74.3              | 39.1        | 60.6            | 74.3 | /    | 33           |
| Rank Product      | 72.5 | 56.4 | 33.9  | 33.9              | 33.9              | 87.5        | 57.1            | 33.9 | 33   | /            |
| Random            | 4.8  | 5    | 4.4   | 4.4               | 4.4               | 5.1         | 4.9             | 4.4  | 4.7  | 5.3          |

### DLBCL, where n = 5

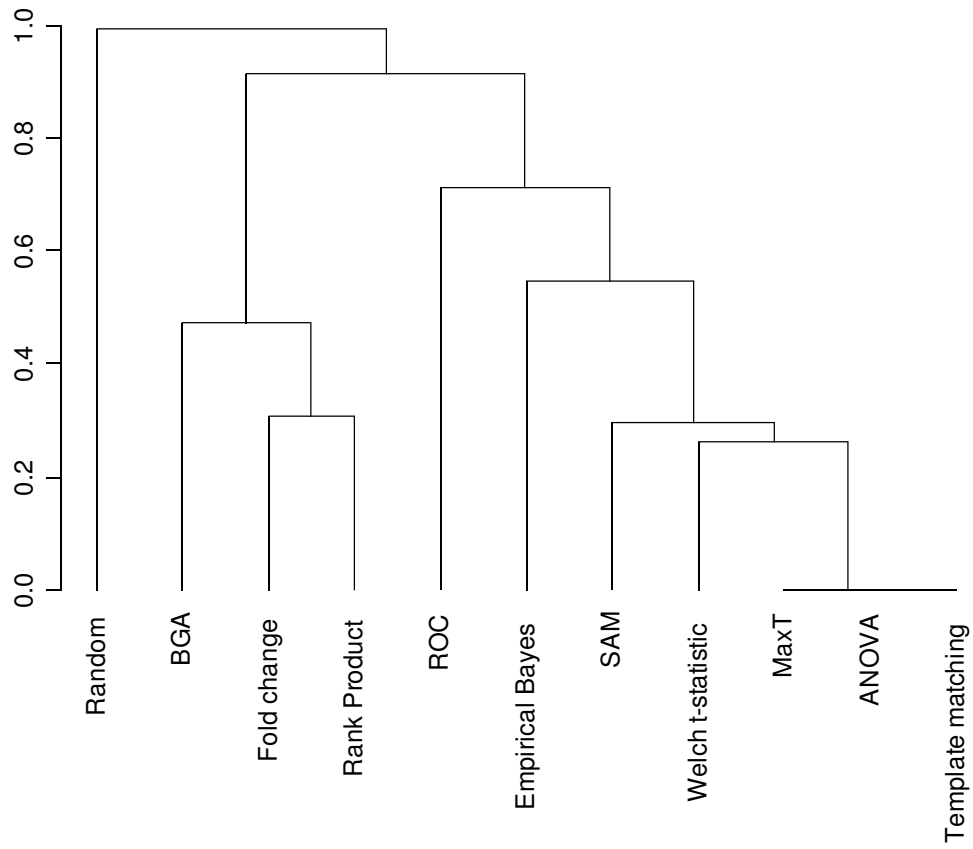

|                   | BGA  | SAM  | ANOVA | Template matching | Welch t-statistic | Fold change | Empirical Bayes | MaxT | ROC  | Rank Product |
|-------------------|------|------|-------|-------------------|-------------------|-------------|-----------------|------|------|--------------|
| BGA               | /    | 18.2 | 11.9  | 11.9              | 10.4              | 70.9        | 27.7            | 11.9 | 10.4 | 67.3         |
| SAM               | 18.2 | /    | 84.5  | 84.5              | 76.3              | 19.7        | 74.3            | 84.5 | 44.4 | 21.3         |
| ANOVA             | 11.9 | 84.5 | /     | 100               | 84.9              | 13.2        | 59.8            | 100  | 47.7 | 15           |
| Template matching | 11.9 | 84.5 | 100   | /                 | 84.9              | 13.2        | 59.8            | 100  | 47.7 | 15           |
| Welch t-statistic | 10.4 | 76.3 | 84.9  | 84.9              | /                 | 11.9        | 57.2            | 84.9 | 43.8 | 13.5         |
| Fold change       | 70.9 | 19.7 | 13.2  | 13.2              | 11.9              | /           | 29.5            | 13.2 | 10.1 | 81.8         |
| Empirical Bayes   | 27.7 | 74.3 | 59.8  | 59.8              | 57.2              | 29.5        | /               | 59.8 | 35.8 | 31.1         |
| MaxT              | 11.9 | 84.5 | 100   | 100               | 84.9              | 13.2        | 59.8            | /    | 47.7 | 15           |
| ROC               | 10.4 | 44.4 | 47.7  | 47.7              | 43.8              | 10.1        | 35.8            | 47.7 | /    | 10.5         |
| Rank Product      | 67.3 | 21.3 | 15    | 15                | 13.5              | 81.8        | 31.1            | 15   | 10.5 | /            |
| Random            | 1    | 1.1  | 1.1   | 1.1               | 1                 | 1.2         | 1               | 1.1  | 2.1  | 1            |

### Leukeamia, where n = 5

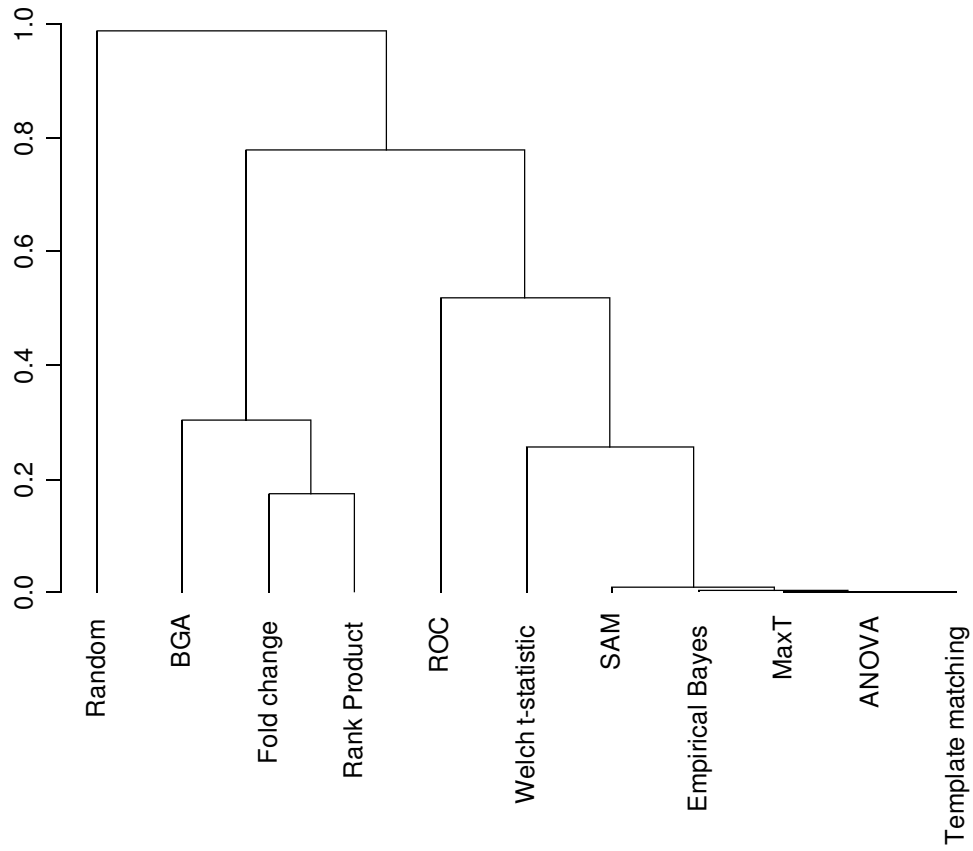

|                   | BGA  | SAM  | ANOVA | Template matching | Welch t-statistic | Fold change | Empirical Bayes | MaxT | ROC  | Rank Product |
|-------------------|------|------|-------|-------------------|-------------------|-------------|-----------------|------|------|--------------|
| BGA               | /    | 36.7 | 36.3  | 36.3              | 33.7              | 83          | 36.5            | 36.3 | 27.6 | 81.1         |
| SAM               | 36.7 | /    | 99.5  | 99.5              | 85.3              | 37.6        | 99.7            | 99.5 | 65.3 | 38.4         |
| ANOVA             | 36.3 | 99.5 | /     | 100               | 85.4              | 37.2        | 99.8            | 100  | 65.4 | 38           |
| Template matching | 36.3 | 99.5 | 100   | /                 | 85.4              | 37.2        | 99.8            | 100  | 65.4 | 38           |
| Welch t-statistic | 33.7 | 85.3 | 85.4  | 85.4              | /                 | 35.8        | 85.3            | 85.4 | 63   | 35.9         |
| Fold change       | 83   | 37.6 | 37.2  | 37.2              | 35.8              | /           | 37.4            | 37.2 | 30.1 | 90.6         |
| Empirical Bayes   | 36.5 | 99.7 | 99.8  | 99.8              | 85.3              | 37.4        | /               | 99.8 | 65.3 | 38.2         |
| MaxT              | 36.3 | 99.5 | 100   | 100               | 85.4              | 37.2        | 99.8            | /    | 65.4 | 38           |
| ROC               | 27.6 | 65.3 | 65.4  | 65.4              | 63                | 30.1        | 65.3            | 65.4 | /    | 31.3         |
| Rank Product      | 81.1 | 38.4 | 38    | 38                | 35.9              | 90.6        | 38.2            | 38   | 31.3 | /            |
| Random            | 1.4  | 2.2  | 2.2   | 2.2               | 2.2               | 1.6         | 2.2             | 2.2  | 1.3  | 1.6          |

### Myeloma, where n = 5

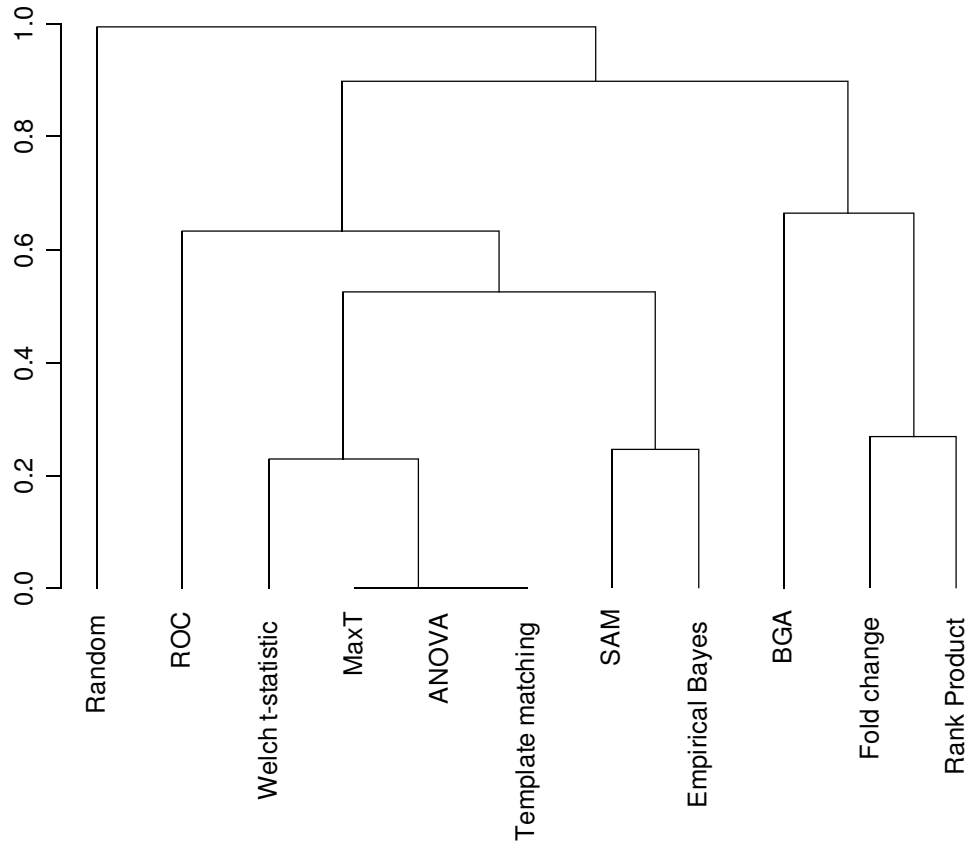

|                   | BGA  | SAM  | ANOVA | Template matching | Welch t-statistic | Fold change | Empirical Bayes | MaxT | ROC  | Rank Product |
|-------------------|------|------|-------|-------------------|-------------------|-------------|-----------------|------|------|--------------|
| BGA               | /    | 23.4 | 13.5  | 13.5              | 12.6              | 52.2        | 24.9            | 13.5 | 9.8  | 48.3         |
| SAM               | 23.4 | /    | 69.9  | 69.9              | 65.4              | 31.9        | 86              | 69.9 | 47.3 | 24.6         |
| ANOVA             | 13.5 | 69.9 | /     | 100               | 87.2              | 18.1        | 60.7            | 100  | 58.8 | 14.5         |
| Template matching | 13.5 | 69.9 | 100   | /                 | 87.2              | 18.1        | 60.7            | 100  | 58.8 | 14.5         |
| Welch t-statistic | 12.6 | 65.4 | 87.2  | 87.2              | /                 | 16.9        | 57.4            | 87.2 | 54.7 | 13.5         |
| Fold change       | 52.2 | 31.9 | 18.1  | 18.1              | 16.9              | /           | 32.8            | 18.1 | 14.3 | 84.5         |
| Empirical Bayes   | 24.9 | 86   | 60.7  | 60.7              | 57.4              | 32.8        | /               | 60.7 | 42.4 | 25.8         |
| MaxT              | 13.5 | 69.9 | 100   | 100               | 87.2              | 18.1        | 60.7            | /    | 58.8 | 14.5         |
| ROC               | 9.8  | 47.3 | 58.8  | 58.8              | 54.7              | 14.3        | 42.4            | 58.8 | /    | 11           |
| Rank Product      | 48.3 | 24.6 | 14.5  | 14.5              | 13.5              | 84.5        | 25.8            | 14.5 | 11   | /            |
| Random            | 0.7  | 0.5  | 0.7   | 0.7               | 0.4               | 1.1         | 0.6             | 0.7  | 1    | 1.3          |



Prostate, where n = 5

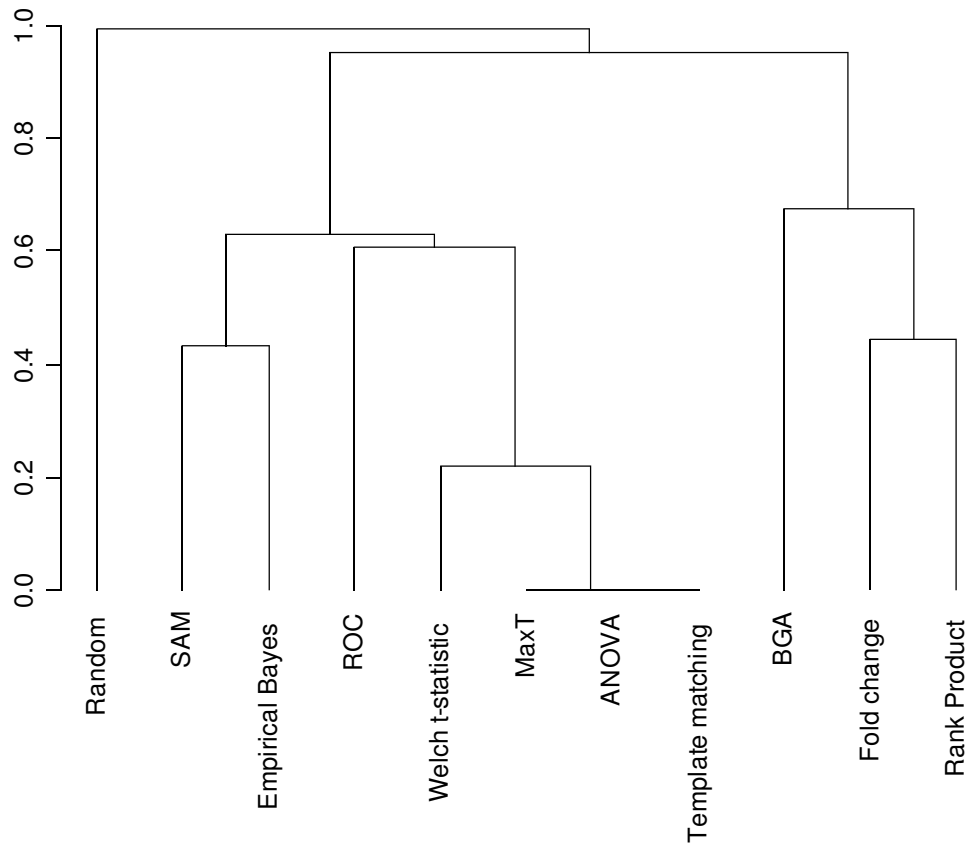

|                   | BGA  | SAM  | ANOVA | Template matching | Welch t-statistic | Fold change | Empirical Bayes | MaxT | ROC  | Rank Product |
|-------------------|------|------|-------|-------------------|-------------------|-------------|-----------------|------|------|--------------|
| BGA               | /    | 24.8 | 6.4   | 6.4               | 5.8               | 49.2        | 18              | 6.4  | 7.7  | 49           |
| SAM               | 24.8 | /    | 57.6  | 57.6              | 52.7              | 19.7        | 72.4            | 57.6 | 41.3 | 22.3         |
| ANOVA             | 6.4  | 57.6 | /     | 100               | 87.7              | 3.8         | 57.3            | 100  | 57.4 | 5.1          |
| Template matching | 6.4  | 57.6 | 100   | /                 | 87.7              | 3.8         | 57.3            | 100  | 57.4 | 5.1          |
| Welch t-statistic | 5.8  | 52.7 | 87.7  | 87.7              | /                 | 3.2         | 53.9            | 87.7 | 54   | 4.5          |
| Fold change       | 49.2 | 19.7 | 3.8   | 3.8               | 3.2               | /           | 10.8            | 3.8  | 3.7  | 71.5         |
| Empirical Bayes   | 18   | 72.4 | 57.3  | 57.3              | 53.9              | 10.8        | /               | 57.3 | 45.9 | 13.8         |
| MaxT              | 6.4  | 57.6 | 100   | 100               | 87.7              | 3.8         | 57.3            | /    | 57.4 | 5.1          |
| ROC               | 7.7  | 41.3 | 57.4  | 57.4              | 54                | 3.7         | 45.9            | 57.4 | /    | 4.7          |
| Rank Product      | 49   | 22.3 | 5.1   | 5.1               | 4.5               | 71.5        | 13.8            | 5.1  | 4.7  | /            |
| Random            | 0.8  | 1.1  | 0.9   | 0.9               | 0.9               | 1.1         | 1               | 0.9  | 1    | 1.2          |
