# Supplementary material for: Comparison and evaluation of methods for generating differentially expressed gene lists from microarray data
Source: PubMed Central journal article supplement (PMC1544358; doi:10.1186/1471-2105-7-359), 2006-07-26
Supplement: 1471-2105-7-359-S2.pdf [file 1471-2105-7-359-S2.pdf]

ALL.1, where n = 10

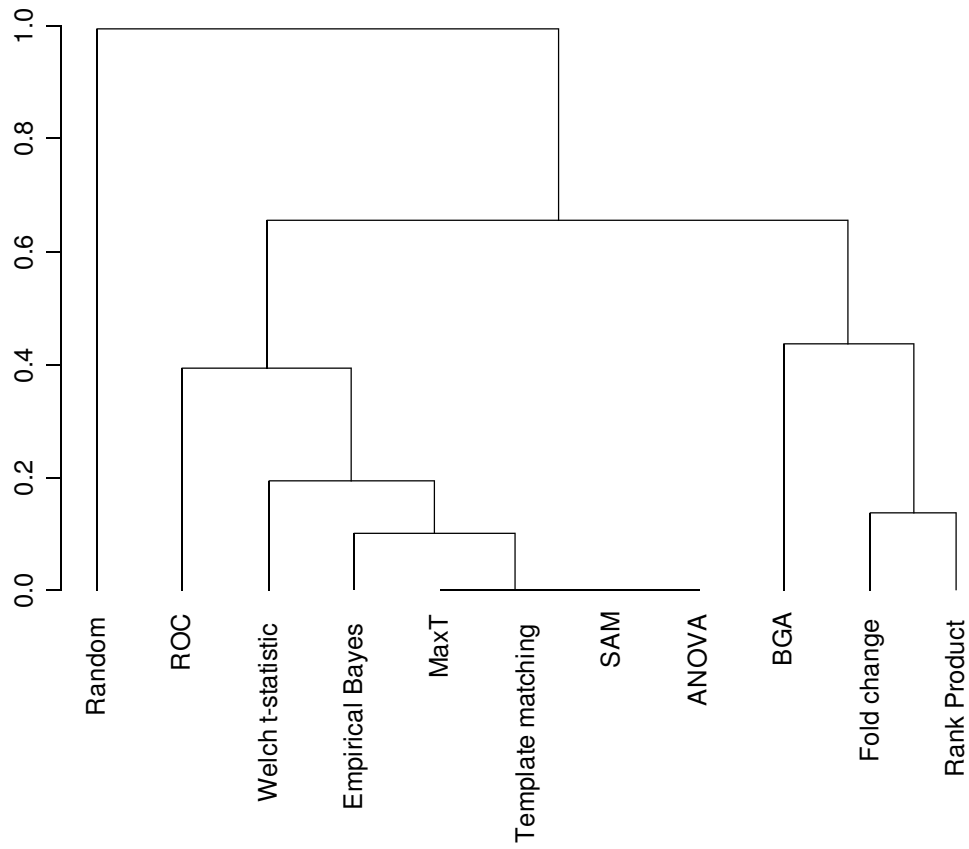

|                   | BGA  | SAM  | ANOVA | Template matching | Welch t-statistic | Fold change | Empirical Bayes | MaxT | ROC  | Rank Product |
|-------------------|------|------|-------|-------------------|-------------------|-------------|-----------------|------|------|--------------|
| BGA               | /    | 46.6 | 46.6  | 46.6              | 43.6              | 73          | 48.4            | 46.6 | 42.2 | 71.1         |
| SAM               | 46.6 | /    | 100   | 100               | 89.6              | 52.9        | 94.8            | 100  | 76.7 | 56.2         |
| ANOVA             | 46.6 | 100  | /     | 100               | 89.6              | 52.9        | 94.8            | 100  | 76.7 | 56.2         |
| Template matching | 46.6 | 100  | 100   | /                 | 89.6              | 52.9        | 94.8            | 100  | 76.7 | 56.2         |
| Welch t-statistic | 43.6 | 89.6 | 89.6  | 89.6              | /                 | 50.5        | 87.8            | 89.6 | 71.5 | 53.5         |
| Fold change       | 73   | 52.9 | 52.9  | 52.9              | 50.5              | /           | 55.4            | 52.9 | 45.6 | 92.7         |
| Empirical Bayes   | 48.4 | 94.8 | 94.8  | 94.8              | 87.8              | 55.4        | /               | 94.8 | 75.1 | 58.9         |
| MaxT              | 46.6 | 100  | 100   | 100               | 89.6              | 52.9        | 94.8            | /    | 76.7 | 56.2         |
| ROC               | 42.2 | 76.7 | 76.7  | 76.7              | 71.5              | 45.6        | 75.1            | 76.7 | /    | 48           |
| Rank Product      | 71.1 | 56.2 | 56.2  | 56.2              | 53.5              | 92.7        | 58.9            | 56.2 | 48   | /            |
| Random            | 0.9  | 0.7  | 0.7   | 0.7               | 0.6               | 0.8         | 0.7             | 0.7  | 0.8  | 0.8          |

ALL.2, where n = 10

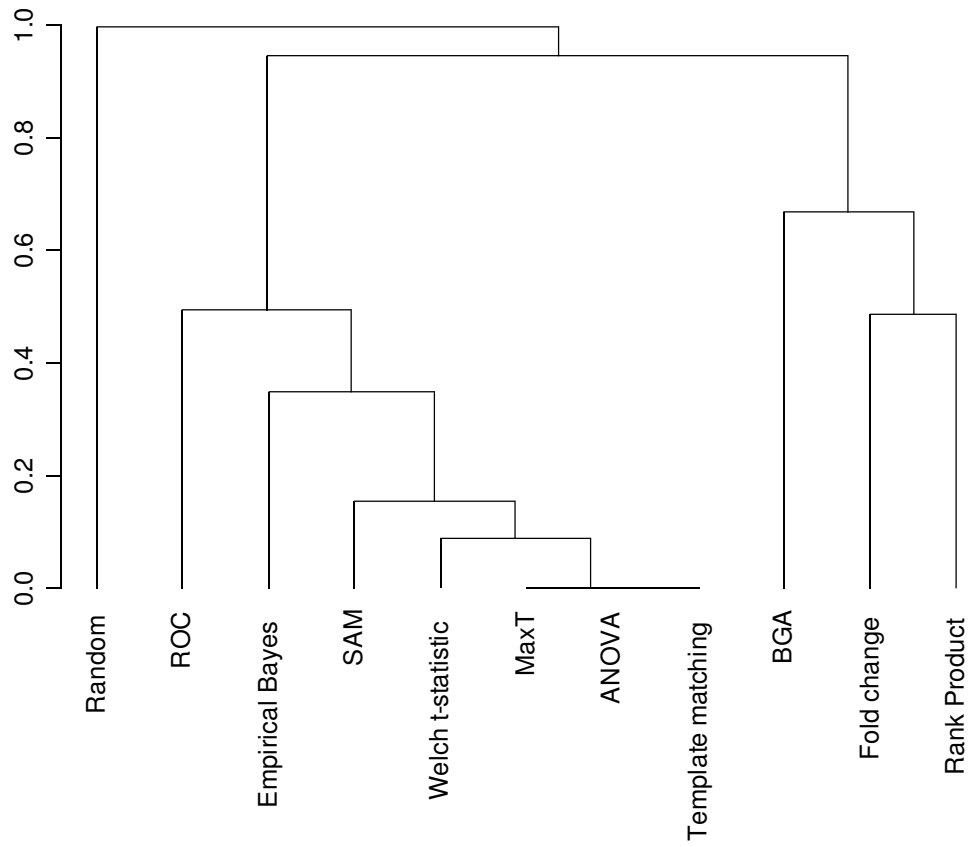

|                   | BGA  | SAM  | ANOVA | Template matching | Welch t-statistic | Fold change | Empirical Bayes | MaxT | ROC  | Rank Product |
|-------------------|------|------|-------|-------------------|-------------------|-------------|-----------------|------|------|--------------|
| BGA               | /    | 12.7 | 10.3  | 10.3              | 9.5               | 56.2        | 15.9            | 10.3 | 8.1  | 42.7         |
| SAM               | 12.7 | /    | 92.4  | 92.4              | 89.1              | 14.8        | 80.4            | 92.4 | 66.5 | 8.9          |
| ANOVA             | 10.3 | 92.4 | /     | 100               | 95.3              | 11.7        | 78.7            | 100  | 69.1 | 7.3          |
| Template matching | 10.3 | 92.4 | 100   | /                 | 95.3              | 11.7        | 78.7            | 100  | 69.1 | 7.3          |
| Welch t-statistic | 9.5  | 89.1 | 95.3  | 95.3              | /                 | 11.9        | 78.4            | 95.3 | 67.4 | 7            |
| Fold change       | 56.2 | 14.8 | 11.7  | 11.7              | 11.9              | /           | 17.9            | 11.7 | 9.4  | 67.9         |
| Empirical Bayes   | 15.9 | 80.4 | 78.7  | 78.7              | 78.4              | 17.9        | /               | 78.7 | 62.2 | 11.4         |
| MaxT              | 10.3 | 92.4 | 100   | 100               | 95.3              | 11.7        | 78.7            | /    | 69.1 | 7.3          |
| ROC               | 8.1  | 66.5 | 69.1  | 69.1              | 67.4              | 9.4         | 62.2            | 69.1 | /    | 6.1          |
| Rank Product      | 42.7 | 8.9  | 7.3   | 7.3               | 7                 | 67.9        | 11.4            | 7.3  | 6.1  | /            |
| Random            | 0.3  | 0.7  | 0.7   | 0.7               | 0.7               | 0.5         | 0.6             | 0.7  | 0.7  | 0.2          |

**ALL.3, where n = 10**

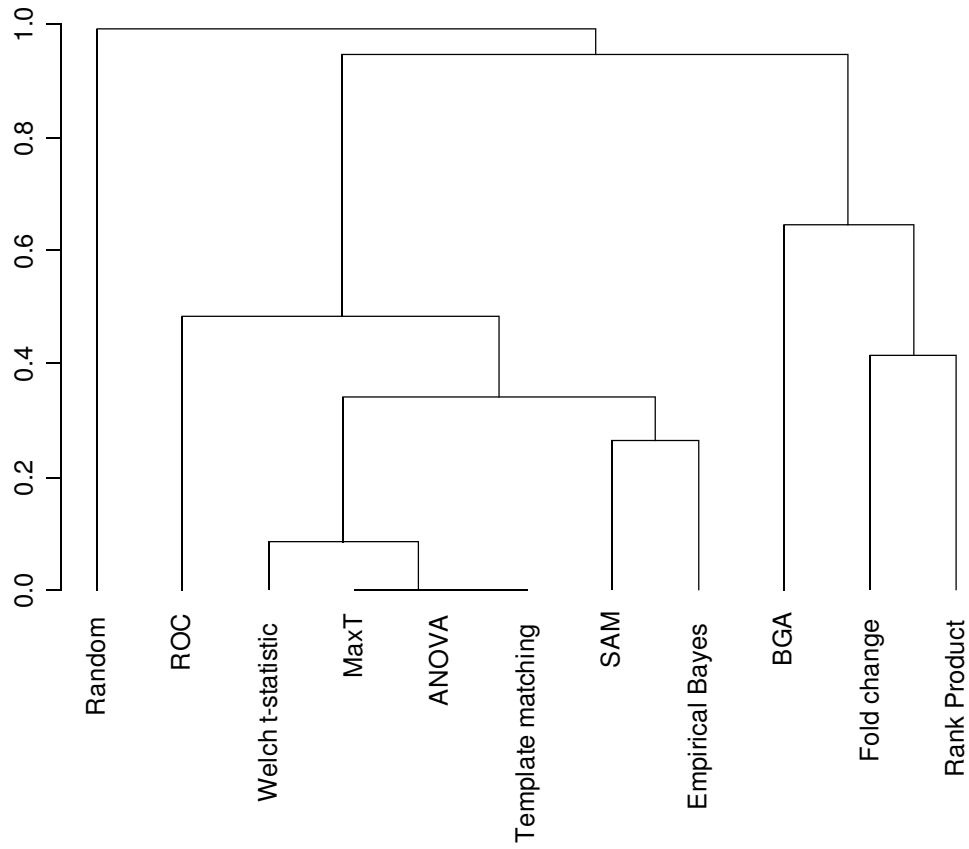

|                   | BGA  | SAM  | ANOVA | Template matching | Welch t-statistic | Fold change | Empirical Bayes | MaxT | ROC  | Rank Product |
|-------------------|------|------|-------|-------------------|-------------------|-------------|-----------------|------|------|--------------|
| BGA               | /    | 15.2 | 8.7   | 8.7               | 8.4               | 57.8        | 15.1            | 8.7  | 9    | 46.1         |
| SAM               | 15.2 | /    | 82    | 82                | 79.3              | 17.3        | 84.8            | 82   | 63.5 | 11.8         |
| ANOVA             | 8.7  | 82   | /     | 100               | 95.5              | 10.2        | 77.8            | 100  | 70.2 | 7            |
| Template matching | 8.7  | 82   | 100   | /                 | 95.5              | 10.2        | 77.8            | 100  | 70.2 | 7            |
| Welch t-statistic | 8.4  | 79.3 | 95.5  | 95.5              | /                 | 10.1        | 76.7            | 95.5 | 70   | 6.8          |
| Fold change       | 57.8 | 17.3 | 10.2  | 10.2              | 10.1              | /           | 16.4            | 10.2 | 9.5  | 73.8         |
| Empirical Bayes   | 15.1 | 84.8 | 77.8  | 77.8              | 76.7              | 16.4        | /               | 77.8 | 63.4 | 11.2         |
| MaxT              | 8.7  | 82   | 100   | 100               | 95.5              | 10.2        | 77.8            | /    | 70.2 | 7            |
| ROC               | 9    | 63.5 | 70.2  | 70.2              | 70                | 9.5         | 63.4            | 70.2 | /    | 6.3          |
| Rank Product      | 46.1 | 11.8 | 7     | 7                 | 6.8               | 73.8        | 11.2            | 7    | 6.3  | /            |
| Random            | 1.4  | 1.4  | 1     | 1                 | 1                 | 1.7         | 1.5             | 1    | 0.7  | 2.1          |

ALL4, where n = 10

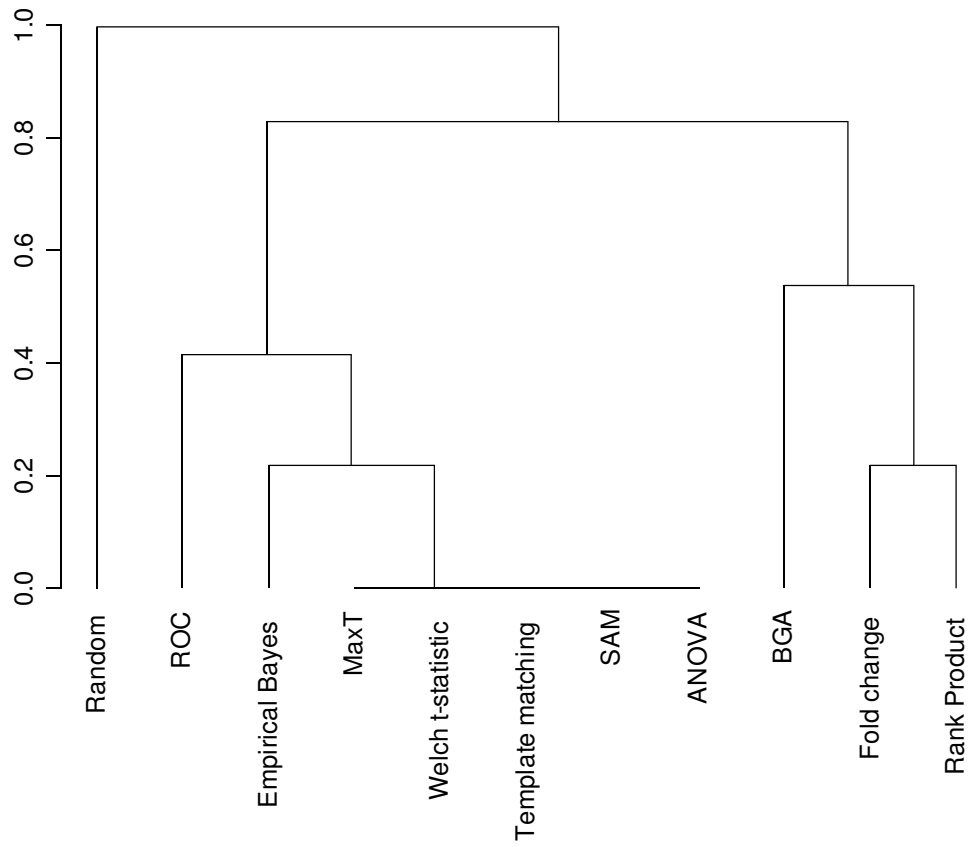

|                   | BGA  | SAM  | ANOVA | Template matching | Welch t-statistic | Fold change | Empirical Bayes | MaxT | ROC  | Rank Product |
|-------------------|------|------|-------|-------------------|-------------------|-------------|-----------------|------|------|--------------|
| BGA               | /    | 26.1 | 26.1  | 26.1              | 26.1              | 64.9        | 31.3            | 26.1 | 25.3 | 61.9         |
| SAM               | 26.1 | /    | 100   | 100               | 100               | 30.9        | 87.8            | 100  | 74.4 | 29.6         |
| ANOVA             | 26.1 | 100  | /     | 100               | 100               | 30.9        | 87.8            | 100  | 74.4 | 29.6         |
| Template matching | 26.1 | 100  | 100   | /                 | 100               | 30.9        | 87.8            | 100  | 74.4 | 29.6         |
| Welch t-statistic | 26.1 | 100  | 100   | 100               | /                 | 30.9        | 87.8            | 100  | 74.4 | 29.6         |
| Fold change       | 64.9 | 30.9 | 30.9  | 30.9              | 30.9              | /           | 36.7            | 30.9 | 28.6 | 87.9         |
| Empirical Bayes   | 31.3 | 87.8 | 87.8  | 87.8              | 87.8              | 36.7        | /               | 87.8 | 71   | 34.7         |
| MaxT              | 26.1 | 100  | 100   | 100               | 100               | 30.9        | 87.8            | /    | 74.4 | 29.6         |
| ROC               | 25.3 | 74.4 | 74.4  | 74.4              | 74.4              | 28.6        | 71              | 74.4 | /    | 27.3         |
| Rank Product      | 61.9 | 29.6 | 29.6  | 29.6              | 29.6              | 87.9        | 34.7            | 29.6 | 27.3 | /            |
| Random            | 0.6  | 0.6  | 0.6   | 0.6               | 0.6               | 0.4         | 0.5             | 0.6  | 0.8  | 0.5          |

Colon, where n = 10

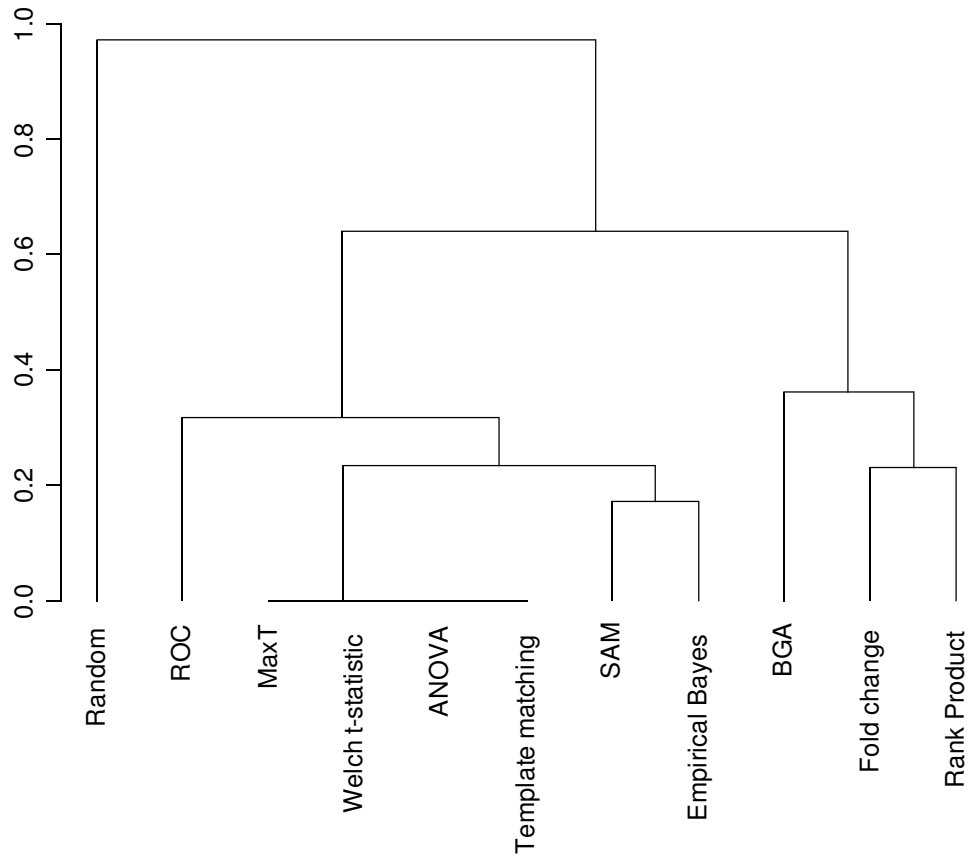

|                       | BGA  | SAM  | ANOVA | Templat<br>e<br>matching | Welch t-<br>statistic | Fold<br>change | Empirica<br>l Bayes | MaxT | ROC  | Rank<br>Product |
|-----------------------|------|------|-------|--------------------------|-----------------------|----------------|---------------------|------|------|-----------------|
| BGA                   | /    | 58.7 | 50.2  | 50.2                     | 50.2                  | 80             | 62.7                | 50.2 | 49.4 | 75.9            |
| SAM                   | 58.7 | /    | 89.2  | 89.2                     | 89.2                  | 63.7           | 90.5                | 89.2 | 77.8 | 53.4            |
| ANOVA                 | 50.2 | 89.2 | /     | 100                      | 100                   | 53.8           | 84.1                | 100  | 83   | 44.4            |
| Template<br>matching  | 50.2 | 89.2 | 100   | /                        | 100                   | 53.8           | 84.1                | 100  | 83   | 44.4            |
| Welch t-<br>statistic | 50.2 | 89.2 | 100   | 100                      | /                     | 53.8           | 84.1                | 100  | 83   | 44.4            |
| Fold<br>change        | 80   | 63.7 | 53.8  | 53.8                     | 53.8                  | /              | 67.4                | 53.8 | 52.7 | 87              |
| Empirica<br>l Bayes   | 62.7 | 90.5 | 84.1  | 84.1                     | 84.1                  | 67.4           | /                   | 84.1 | 77.1 | 57              |
| MaxT                  | 50.2 | 89.2 | 100   | 100                      | 100                   | 53.8           | 84.1                | /    | 83   | 44.4            |
| ROC                   | 49.4 | 77.8 | 83    | 83                       | 83                    | 52.7           | 77.1                | 83   | /    | 43.5            |
| Rank<br>Product       | 75.9 | 53.4 | 44.4  | 44.4                     | 44.4                  | 87             | 57                  | 44.4 | 43.5 | /               |
| Random                | 5.7  | 5.3  | 5.4   | 5.4                      | 5.4                   | 5.3            | 5.7                 | 5.4  | 5.2  | 5.2             |

### DLBCL, where n = 10

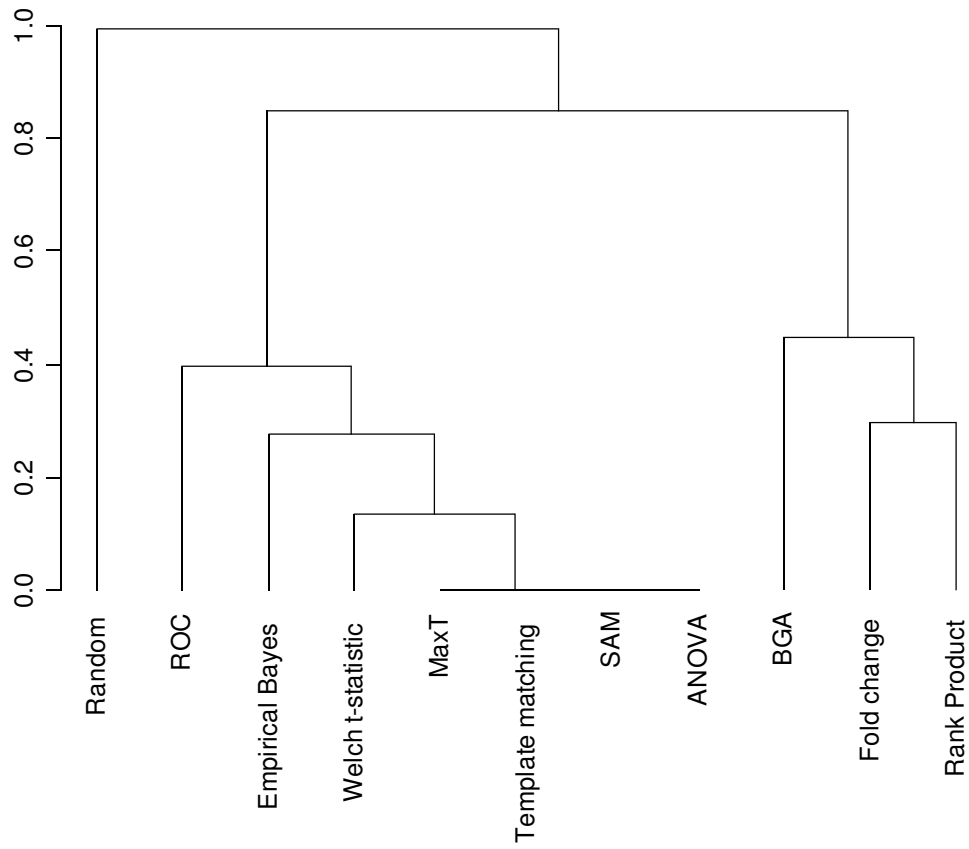

|                       | BGA  | SAM  | ANOVA | Templat<br>e<br>matching | Welch t-<br>statistic | Fold<br>change | Empirica<br>l Bayes | MaxT | ROC  | Rank<br>Product |
|-----------------------|------|------|-------|--------------------------|-----------------------|----------------|---------------------|------|------|-----------------|
| BGA                   | /    | 23.8 | 23.8  | 23.8                     | 23.5                  | 72.9           | 31.4                | 23.8 | 22.8 | 69.4            |
| SAM                   | 23.8 | /    | 100   | 100                      | 92.8                  | 27.1           | 84.4                | 100  | 76.6 | 25.5            |
| ANOVA                 | 23.8 | 100  | /     | 100                      | 92.8                  | 27.1           | 84.4                | 100  | 76.6 | 25.5            |
| Template<br>matching  | 23.8 | 100  | 100   | /                        | 92.8                  | 27.1           | 84.4                | 100  | 76.6 | 25.5            |
| Welch t-<br>statistic | 23.5 | 92.8 | 92.8  | 92.8                     | /                     | 27             | 81.8                | 92.8 | 74.3 | 25.6            |
| Fold<br>change        | 72.9 | 27.1 | 27.1  | 27.1                     | 27                    | /              | 36.3                | 27.1 | 25.2 | 82.7            |
| Empirica<br>l Bayes   | 31.4 | 84.4 | 84.4  | 84.4                     | 81.8                  | 36.3           | /                   | 84.4 | 70.7 | 34.1            |
| MaxT                  | 23.8 | 100  | 100   | 100                      | 92.8                  | 27.1           | 84.4                | /    | 76.6 | 25.5            |
| ROC                   | 22.8 | 76.6 | 76.6  | 76.6                     | 74.3                  | 25.2           | 70.7                | 76.6 | /    | 23.5            |
| Rank<br>Product       | 69.4 | 25.5 | 25.5  | 25.5                     | 25.6                  | 82.7           | 34.1                | 25.5 | 23.5 | /               |
| Random                | 1.8  | 0.8  | 0.8   | 0.8                      | 0.8                   | 1.9            | 0.7                 | 0.8  | 1.2  | 1.8             |

### Leukaemia, where n = 10

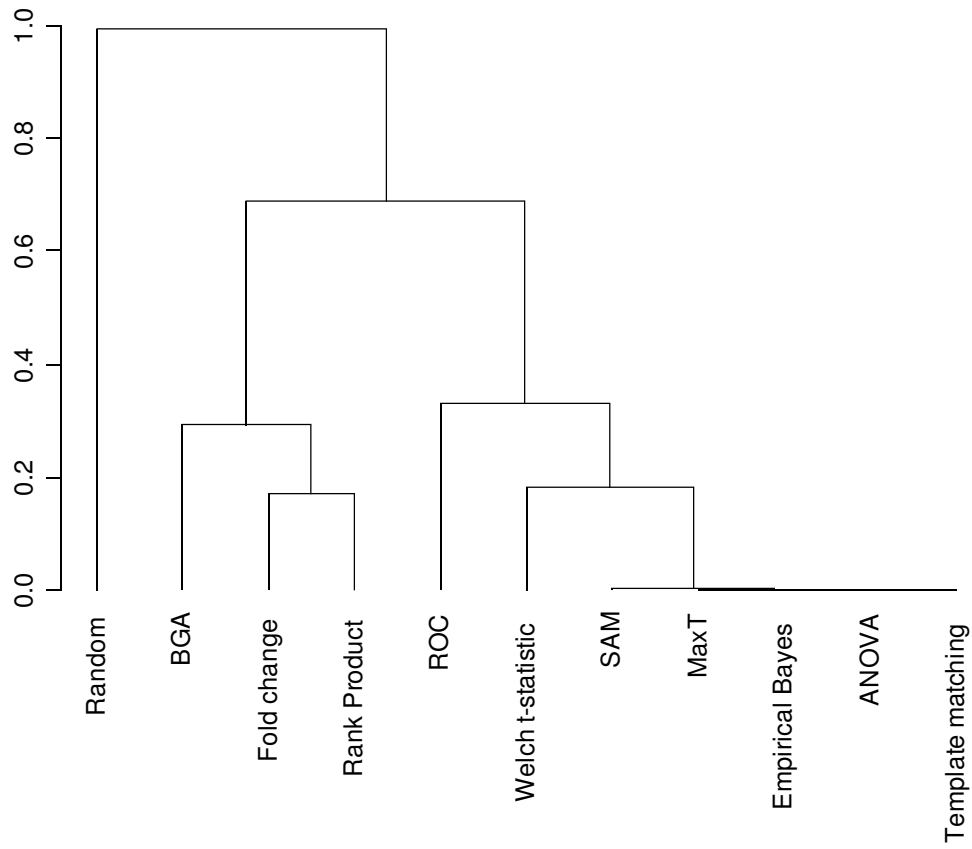

|                   | BGA  | SAM  | ANOVA | Template matching | Welch t-statistic | Fold change | Empirical Bayes | MaxT | ROC  | Rank Product |
|-------------------|------|------|-------|-------------------|-------------------|-------------|-----------------|------|------|--------------|
| BGA               | /    | 47.9 | 47.9  | 47.9              | 43.8              | 83.9        | 47.9            | 47.9 | 41.7 | 81.7         |
| SAM               | 47.9 | /    | 99.9  | 99.9              | 89.9              | 49.4        | 99.9            | 99.9 | 80.1 | 48.3         |
| ANOVA             | 47.9 | 99.9 | /     | 100               | 89.9              | 49.4        | 100             | 100  | 80.1 | 48.3         |
| Template matching | 47.9 | 99.9 | 100   | /                 | 89.9              | 49.4        | 100             | 100  | 80.1 | 48.3         |
| Welch t-statistic | 43.8 | 89.9 | 89.9  | 89.9              | /                 | 46.4        | 89.9            | 89.9 | 81.1 | 46.2         |
| Fold change       | 83.9 | 49.4 | 49.4  | 49.4              | 46.4              | /           | 49.4            | 49.4 | 43.7 | 90.7         |
| Empirical Bayes   | 47.9 | 99.9 | 100   | 100               | 89.9              | 49.4        | /               | 100  | 80.1 | 48.3         |
| MaxT              | 47.9 | 99.9 | 100   | 100               | 89.9              | 49.4        | 100             | /    | 80.1 | 48.3         |
| ROC               | 41.7 | 80.1 | 80.1  | 80.1              | 81.1              | 43.7        | 80.1            | 80.1 | /    | 42.9         |
| Rank Product      | 81.7 | 48.3 | 48.3  | 48.3              | 46.2              | 90.7        | 48.3            | 48.3 | 42.9 | /            |
| Random            | 1    | 0.9  | 0.9   | 0.9               | 0.9               | 1.2         | 0.9             | 0.9  | 0.9  | 1.1          |

### Myeloma, where n = 10

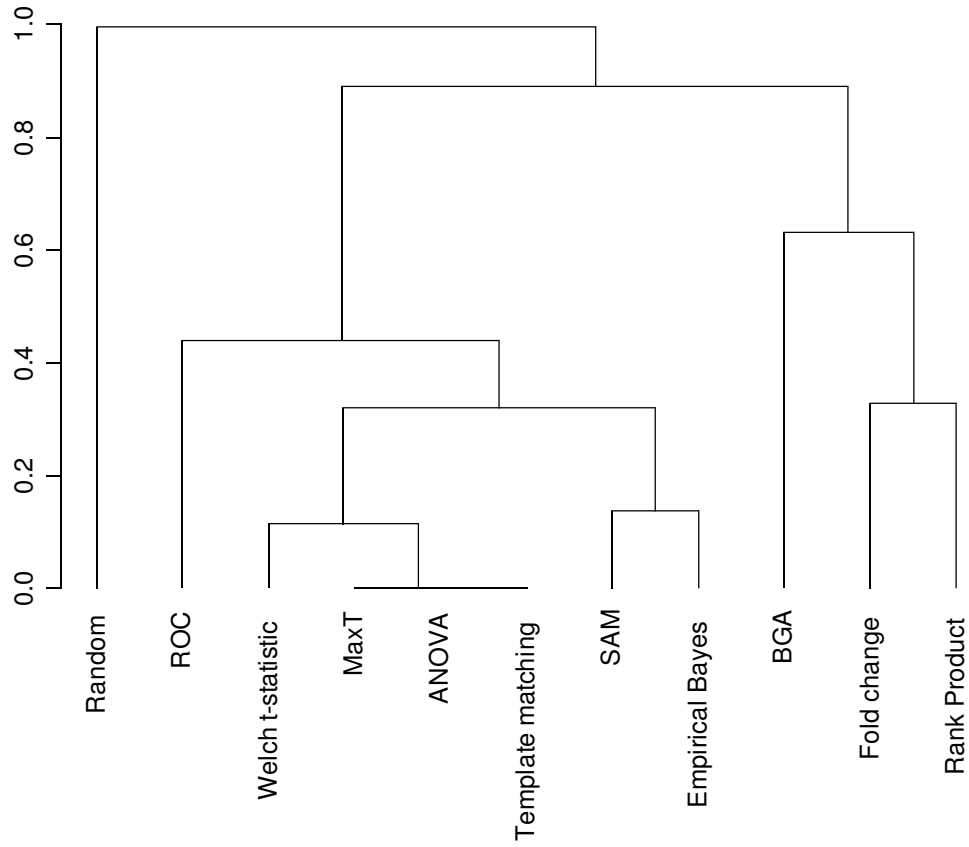

|                       | BGA  | SAM  | ANOVA | Templat<br>e<br>matching | Welch t-<br>statistic | Fold<br>change | Empirica<br>l Bayes | MaxT | ROC  | Rank<br>Product |
|-----------------------|------|------|-------|--------------------------|-----------------------|----------------|---------------------|------|------|-----------------|
| BGA                   | /    | 23.7 | 17.8  | 17.8                     | 17                    | 56.2           | 24.5                | 17.8 | 14.9 | 51.7            |
| SAM                   | 23.7 | /    | 84.1  | 84.1                     | 81                    | 29             | 92.7                | 84.1 | 68.2 | 21              |
| ANOVA                 | 17.8 | 84.1 | /     | 100                      | 94                    | 21.7           | 79.3                | 100  | 74.3 | 15.5            |
| Template<br>matching  | 17.8 | 84.1 | 100   | /                        | 94                    | 21.7           | 79.3                | 100  | 74.3 | 15.5            |
| Welch t-<br>statistic | 17   | 81   | 94    | 94                       | /                     | 21             | 76.7                | 94   | 73   | 15              |
| Fold<br>change        | 56.2 | 29   | 21.7  | 21.7                     | 21                    | /              | 29.1                | 21.7 | 19.1 | 80.3            |
| Empirica<br>l Bayes   | 24.5 | 92.7 | 79.3  | 79.3                     | 76.7                  | 29.1           | /                   | 79.3 | 66.2 | 20.8            |
| MaxT                  | 17.8 | 84.1 | 100   | 100                      | 94                    | 21.7           | 79.3                | /    | 74.3 | 15.5            |
| ROC                   | 14.9 | 68.2 | 74.3  | 74.3                     | 73                    | 19.1           | 66.2                | 74.3 | /    | 13.4            |
| Rank<br>Product       | 51.7 | 21   | 15.5  | 15.5                     | 15                    | 80.3           | 20.8                | 15.5 | 13.4 | /               |
| Random                | 1.1  | 0.7  | 0.7   | 0.7                      | 0.6                   | 0.5            | 0.7                 | 0.7  | 0.8  | 0.8             |



Prostate, where n = 10

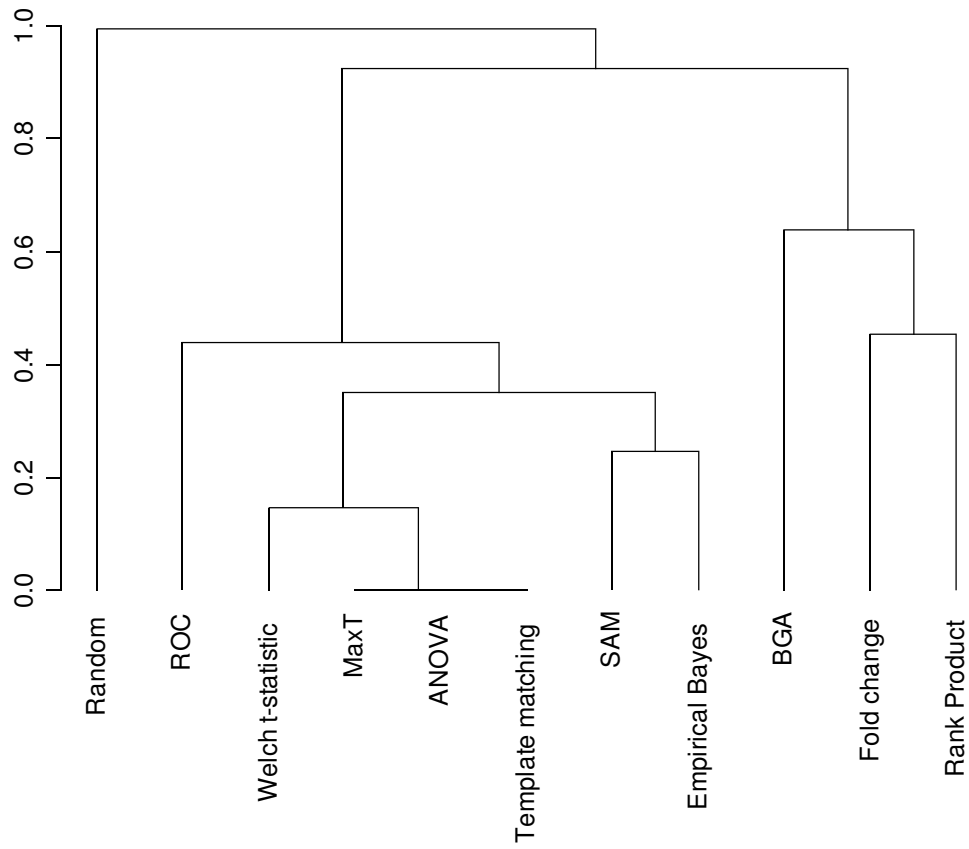

|                   | BGA  | SAM  | ANOVA | Template matching | Welch t-statistic | Fold change | Empirical Bayes | MaxT | ROC  | Rank Product |
|-------------------|------|------|-------|-------------------|-------------------|-------------|-----------------|------|------|--------------|
| BGA               | /    | 24.2 | 14.8  | 14.8              | 12.8              | 52          | 20.4            | 14.8 | 15.3 | 54.4         |
| SAM               | 24.2 | /    | 77.8  | 77.8              | 73.1              | 17.5        | 86.1            | 77.8 | 67   | 21.8         |
| ANOVA             | 14.8 | 77.8 | /     | 100               | 92.2              | 10.2        | 81.4            | 100  | 74.1 | 13           |
| Template matching | 14.8 | 77.8 | 100   | /                 | 92.2              | 10.2        | 81.4            | 100  | 74.1 | 13           |
| Welch t-statistic | 12.8 | 73.1 | 92.2  | 92.2              | /                 | 8.9         | 78.6            | 92.2 | 72.1 | 11.6         |
| Fold change       | 52   | 17.5 | 10.2  | 10.2              | 8.9               | /           | 14              | 10.2 | 8.5  | 70.6         |
| Empirical Bayes   | 20.4 | 86.1 | 81.4  | 81.4              | 78.6              | 14          | /               | 81.4 | 69.7 | 17.5         |
| MaxT              | 14.8 | 77.8 | 100   | 100               | 92.2              | 10.2        | 81.4            | /    | 74.1 | 13           |
| ROC               | 15.3 | 67   | 74.1  | 74.1              | 72.1              | 8.5         | 69.7            | 74.1 | /    | 11.1         |
| Rank Product      | 54.4 | 21.8 | 13    | 13                | 11.6              | 70.6        | 17.5            | 13   | 11.1 | /            |
| Random            | 0.8  | 0.8  | 0.8   | 0.8               | 0.8               | 1           | 0.8             | 0.8  | 0.6  | 0.9          |
