# Supplementary material for: Comparison and evaluation of methods for generating differentially expressed gene lists from microarray data
Source: PubMed Central journal article supplement (PMC1544358; doi:10.1186/1471-2105-7-359), 2006-07-26
Supplement: 1471-2105-7-359-S3.pdf [file 1471-2105-7-359-S3.pdf]

**ALL1, where n = 50%**

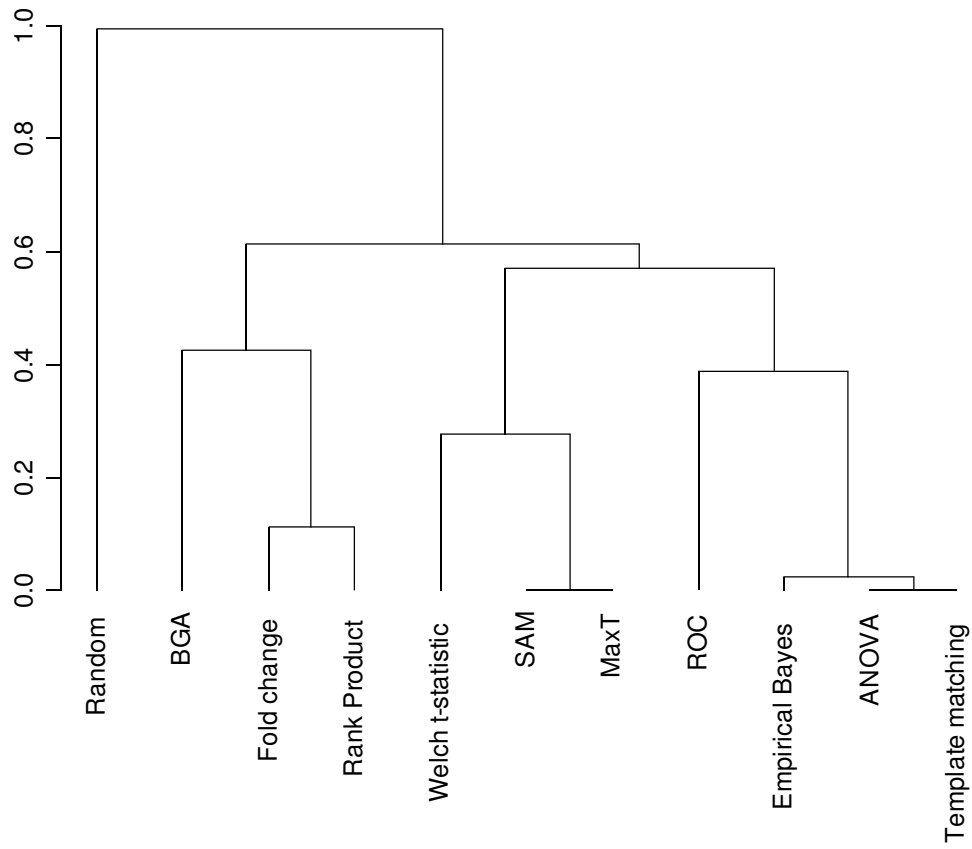

|                   | BGA  | SAM  | ANOVA | Template matching | Welch t-statistic | Fold change | Empirical Bayes | MaxT | ROC  | Rank Product |
|-------------------|------|------|-------|-------------------|-------------------|-------------|-----------------|------|------|--------------|
| BGA               | /    | 51.8 | 54.4  | 54.4              | 44.9              | 72.8        | 55              | 51.8 | 51.3 | 73.1         |
| SAM               | 51.8 | /    | 59.1  | 59.1              | 83.9              | 58.9        | 59.3            | 100  | 78.6 | 59.6         |
| ANOVA             | 54.4 | 59.1 | /     | 100               | 44.2              | 57.3        | 98.9            | 59.1 | 76   | 59.7         |
| Template matching | 54.4 | 59.1 | 100   | /                 | 44.2              | 57.3        | 98.9            | 59.1 | 76   | 59.7         |
| Welch t-statistic | 44.9 | 83.9 | 44.2  | 44.2              | /                 | 51.5        | 44.3            | 83.9 | 65   | 50.5         |
| Fold change       | 72.8 | 58.9 | 57.3  | 57.3              | 51.5              | /           | 58.1            | 58.9 | 56.3 | 94.1         |
| Empirical Bayes   | 55   | 59.3 | 98.9  | 98.9              | 44.3              | 58.1        | /               | 59.3 | 76   | 60.4         |
| MaxT              | 51.8 | 100  | 59.1  | 59.1              | 83.9              | 58.9        | 59.3            | /    | 78.6 | 59.6         |
| ROC               | 51.3 | 78.6 | 76    | 76                | 65                | 56.3        | 76              | 78.6 | /    | 58.1         |
| Rank Product      | 73.1 | 59.6 | 59.7  | 59.7              | 50.5              | 94.1        | 60.4            | 59.6 | 58.1 | /            |
| Random            | 1    | 1    | 0.7   | 0.7               | 0.9               | 0.9         | 0.7             | 1    | 0.9  | 0.9          |

**ALL2, where n = 50%**

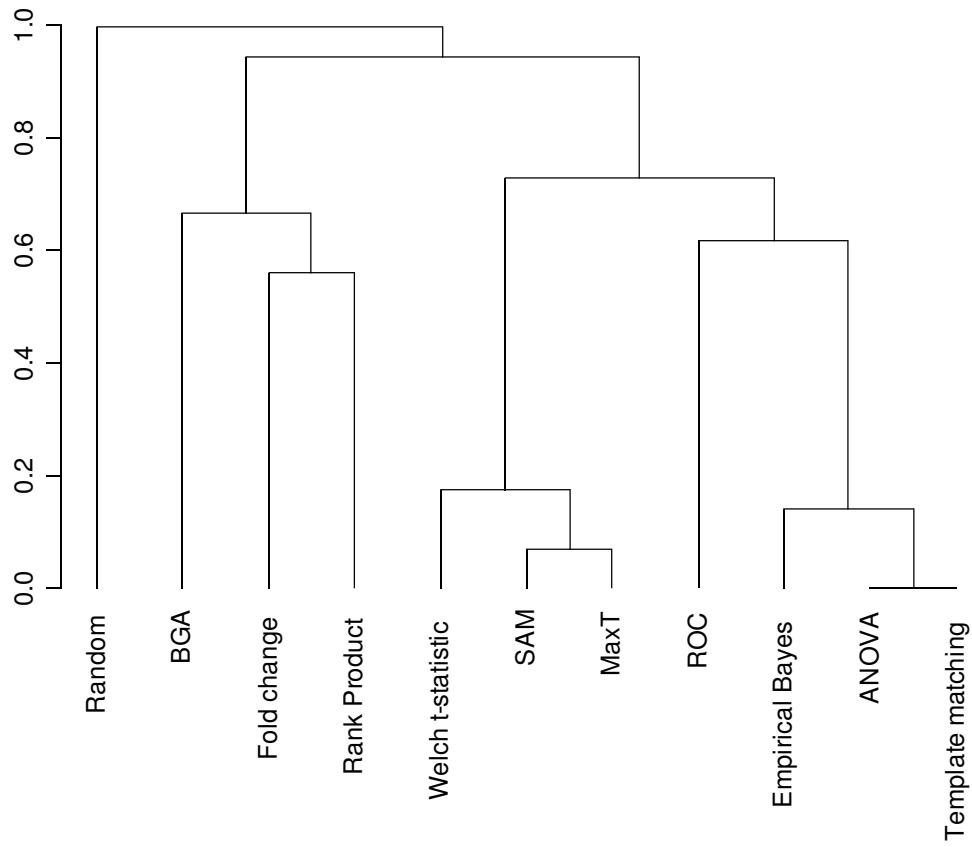

|                   | BGA  | SAM  | ANOVA | Template matching | Welch t-statistic | Fold change | Empirical Bayes | MaxT | ROC  | Rank Product |
|-------------------|------|------|-------|-------------------|-------------------|-------------|-----------------|------|------|--------------|
| BGA               | /    | 17.6 | 12.1  | 12.1              | 17.1              | 58.5        | 14.3            | 16.3 | 9.5  | 41.1         |
| SAM               | 17.6 | /    | 40.6  | 40.6              | 89.1              | 15.9        | 40.5            | 96.4 | 53.8 | 7.1          |
| ANOVA             | 12.1 | 40.6 | /     | 100               | 35                | 11.1        | 92.4            | 41.3 | 55.8 | 5            |
| Template matching | 12.1 | 40.6 | 100   | /                 | 35                | 11.1        | 92.4            | 41.3 | 55.8 | 5            |
| Welch t-statistic | 17.1 | 89.1 | 35    | 35                | /                 | 14.2        | 34.9            | 91.9 | 50.6 | 6.5          |
| Fold change       | 58.5 | 15.9 | 11.1  | 11.1              | 14.2              | /           | 12.7            | 14.2 | 9.8  | 61.3         |
| Empirical Bayes   | 14.3 | 40.5 | 92.4  | 92.4              | 34.9              | 12.7        | /               | 41.1 | 55   | 5.5          |
| MaxT              | 16.3 | 96.4 | 41.3  | 41.3              | 91.9              | 14.2        | 41.1            | /    | 56.1 | 6.5          |
| ROC               | 9.5  | 53.8 | 55.8  | 55.8              | 50.6              | 9.8         | 55              | 56.1 | /    | 5            |
| Rank Product      | 41.1 | 7.1  | 5     | 5                 | 6.5               | 61.3        | 5.5             | 6.5  | 5    | /            |
| Random            | 0.7  | 0.3  | 0.9   | 0.9               | 0.2               | 0.3         | 0.9             | 0.3  | 0.6  | 1            |

**ALL3, where n = 50%**

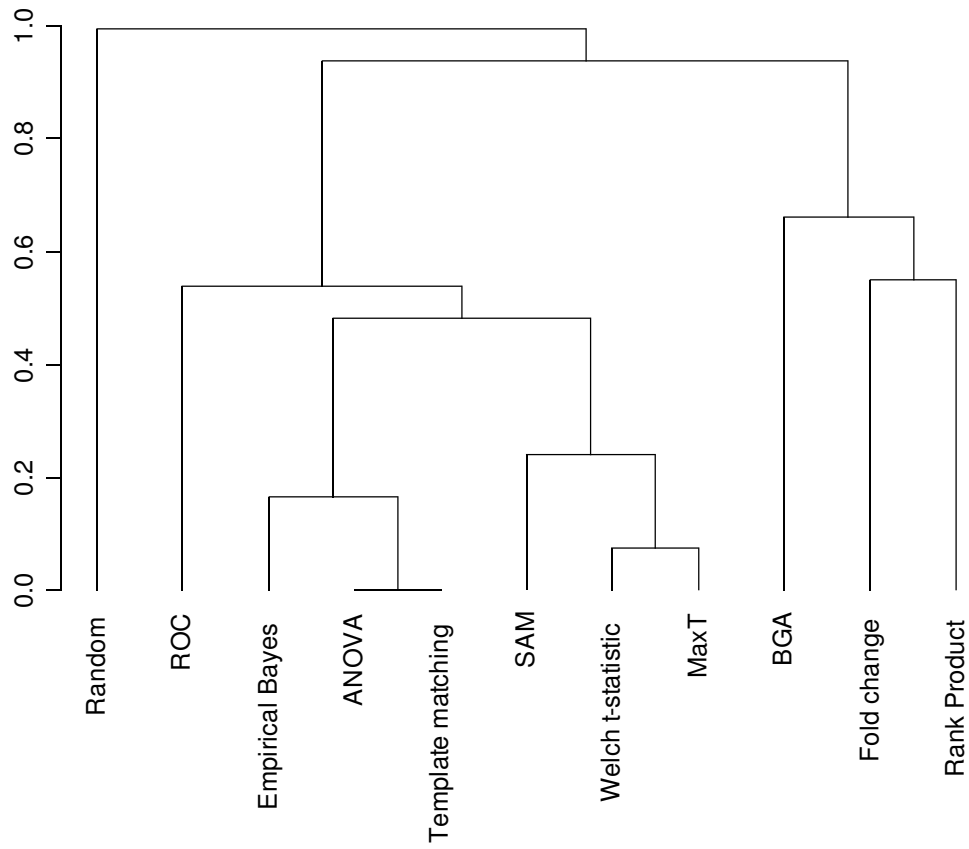

|                   | BGA  | SAM  | ANOVA | Template matching | Welch t-statistic | Fold change | Empirical Bayes | MaxT | ROC  | Rank Product |
|-------------------|------|------|-------|-------------------|-------------------|-------------|-----------------|------|------|--------------|
| BGA               | /    | 21.2 | 11.7  | 11.7              | 16.9              | 59.5        | 13.8            | 16.4 | 11.1 | 40.3         |
| SAM               | 21.2 | /    | 66.1  | 66.1              | 85                | 18          | 67.4            | 87.6 | 58.5 | 8.2          |
| ANOVA             | 11.7 | 66.1 | /     | 100               | 67.6              | 11.9        | 90.9            | 71.4 | 64.9 | 5.7          |
| Template matching | 11.7 | 66.1 | 100   | /                 | 67.6              | 11.9        | 90.9            | 71.4 | 64.9 | 5.7          |
| Welch t-statistic | 16.9 | 85   | 67.6  | 67.6              | /                 | 13.7        | 66.9            | 96.1 | 62.6 | 6            |
| Fold change       | 59.5 | 18   | 11.9  | 11.9              | 13.7              | /           | 14.9            | 13.6 | 10.4 | 62.1         |
| Empirical Bayes   | 13.8 | 67.4 | 90.9  | 90.9              | 66.9              | 14.9        | /               | 70.5 | 64.2 | 7.3          |
| MaxT              | 16.4 | 87.6 | 71.4  | 71.4              | 96.1              | 13.6        | 70.5            | /    | 63.4 | 6            |
| ROC               | 11.1 | 58.5 | 64.9  | 64.9              | 62.6              | 10.4        | 64.2            | 63.4 | /    | 5.3          |
| Rank Product      | 40.3 | 8.2  | 5.7   | 5.7               | 6                 | 62.1        | 7.3             | 6    | 5.3  | /            |
| Random            | 0.6  | 0.8  | 0.9   | 0.9               | 0.7               | 0.8         | 0.9             | 0.7  | 0.7  | 0.8          |

ALL4, where n = 50%

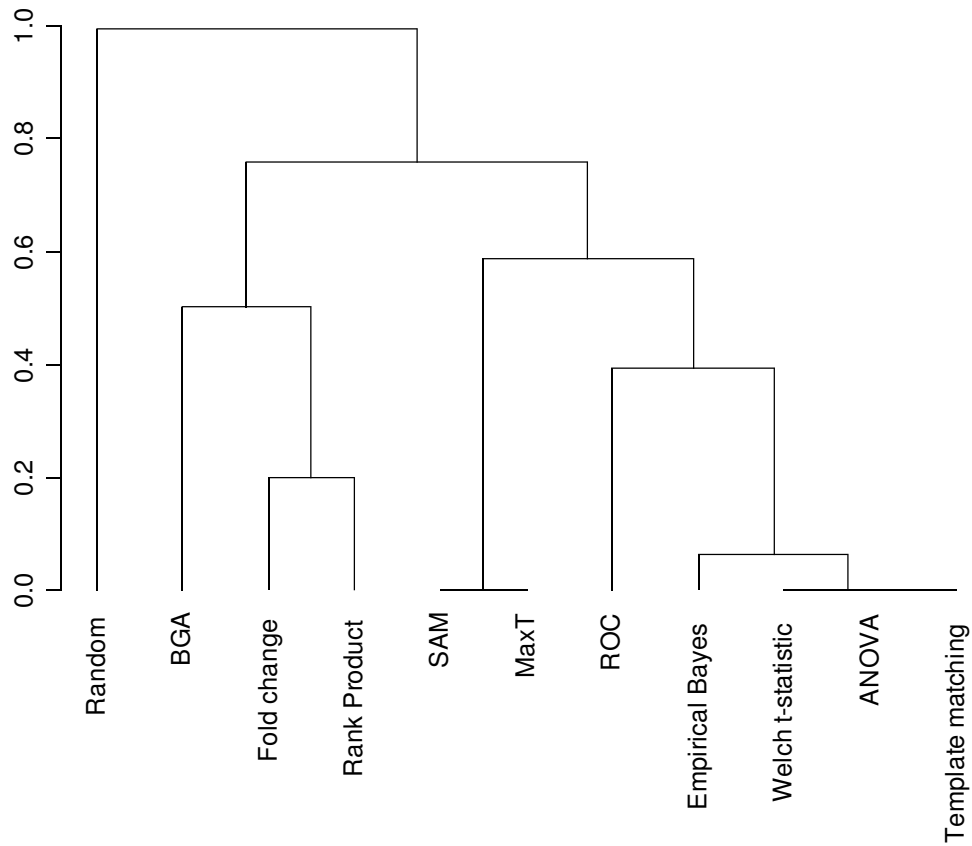

|                   | BGA  | SAM  | ANOVA | Template matching | Welch t-statistic | Fold change | Empirical Bayes | MaxT | ROC  | Rank Product |
|-------------------|------|------|-------|-------------------|-------------------|-------------|-----------------|------|------|--------------|
| BGA               | /    | 37.5 | 39.3  | 39.3              | 39.3              | 68.1        | 40.3            | 37.5 | 38.1 | 65.1         |
| SAM               | 37.5 | /    | 56.4  | 56.4              | 56.4              | 45.1        | 57.1            | 100  | 65   | 41.7         |
| ANOVA             | 39.3 | 56.4 | /     | 100               | 100               | 37.9        | 96.8            | 56.4 | 75.4 | 35.5         |
| Template matching | 39.3 | 56.4 | 100   | /                 | 100               | 37.9        | 96.8            | 56.4 | 75.4 | 35.5         |
| Welch t-statistic | 39.3 | 56.4 | 100   | 100               | /                 | 37.9        | 96.8            | 56.4 | 75.4 | 35.5         |
| Fold change       | 68.1 | 45.1 | 37.9  | 37.9              | 37.9              | /           | 39.3            | 45.1 | 38.2 | 88.9         |
| Empirical Bayes   | 40.3 | 57.1 | 96.8  | 96.8              | 96.8              | 39.3        | /               | 57.1 | 75.9 | 36.7         |
| MaxT              | 37.5 | 100  | 56.4  | 56.4              | 56.4              | 45.1        | 57.1            | /    | 65   | 41.7         |
| ROC               | 38.1 | 65   | 75.4  | 75.4              | 75.4              | 38.2        | 75.9            | 65   | /    | 36.2         |
| Rank Product      | 65.1 | 41.7 | 35.5  | 35.5              | 35.5              | 88.9        | 36.7            | 41.7 | 36.2 | /            |
| Random            | 0.8  | 0.7  | 1     | 1                 | 1                 | 0.8         | 1               | 0.7  | 0.9  | 0.8          |

Colon, where n = 50%

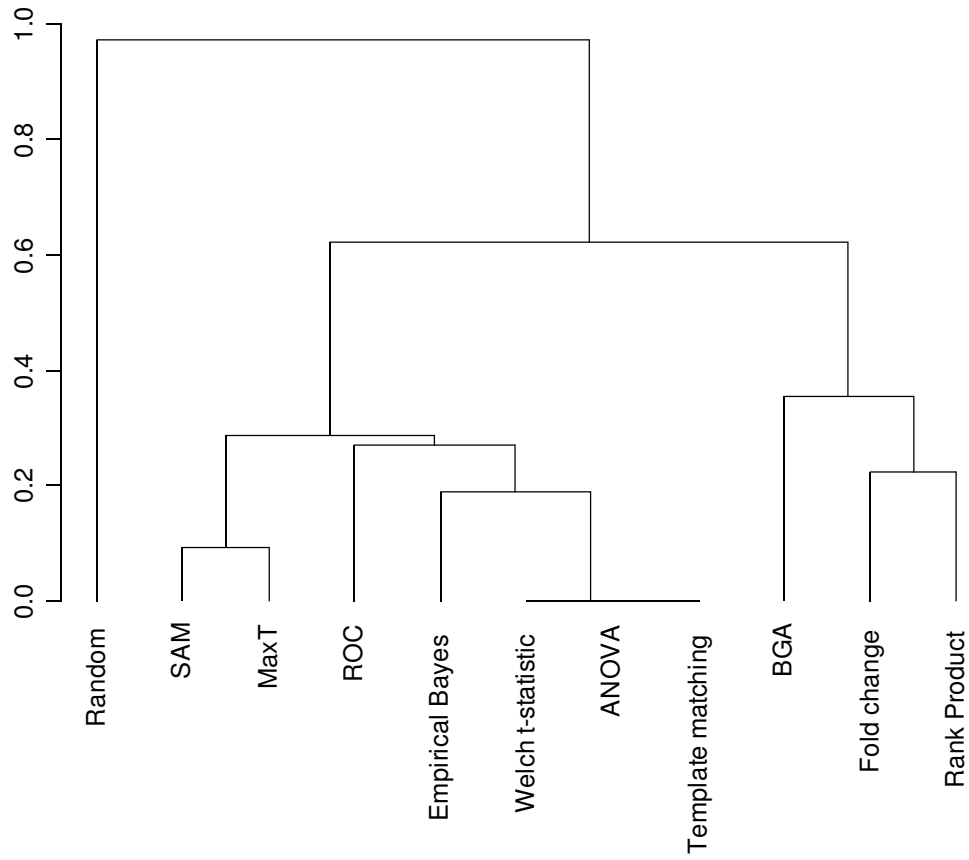

|                   | BGA  | SAM  | ANOVA | Template matching | Welch t-statistic | Fold change | Empirical Bayes | MaxT | ROC  | Rank Product |
|-------------------|------|------|-------|-------------------|-------------------|-------------|-----------------|------|------|--------------|
| BGA               | /    | 56.4 | 54.6  | 54.6              | 54.6              | 80.2        | 63              | 52.7 | 53.1 | 76.7         |
| SAM               | 56.4 | /    | 82.9  | 82.9              | 82.9              | 60.3        | 83.2            | 95.2 | 82.8 | 50.3         |
| ANOVA             | 54.6 | 82.9 | /     | 100               | 100               | 57.9        | 89.6            | 84.3 | 85.2 | 47.9         |
| Template matching | 54.6 | 82.9 | 100   | /                 | 100               | 57.9        | 89.6            | 84.3 | 85.2 | 47.9         |
| Welch t-statistic | 54.6 | 82.9 | 100   | 100               | /                 | 57.9        | 89.6            | 84.3 | 85.2 | 47.9         |
| Fold change       | 80.2 | 60.3 | 57.9  | 57.9              | 57.9              | /           | 66.7            | 56.2 | 56.7 | 87.4         |
| Empirical Bayes   | 63   | 83.2 | 89.6  | 89.6              | 89.6              | 66.7        | /               | 80.9 | 81.5 | 56.2         |
| MaxT              | 52.7 | 95.2 | 84.3  | 84.3              | 84.3              | 56.2        | 80.9            | /    | 84.2 | 46.4         |
| ROC               | 53.1 | 82.8 | 85.2  | 85.2              | 85.2              | 56.7        | 81.5            | 84.2 | /    | 46.9         |
| Rank Product      | 76.7 | 50.3 | 47.9  | 47.9              | 47.9              | 87.4        | 56.2            | 46.4 | 46.9 | /            |
| Random            | 4.8  | 5.2  | 5.3   | 5.3               | 5.3               | 4.8         | 5.6             | 5.3  | 5.4  | 4.3          |

DLBCL, where n = 50%

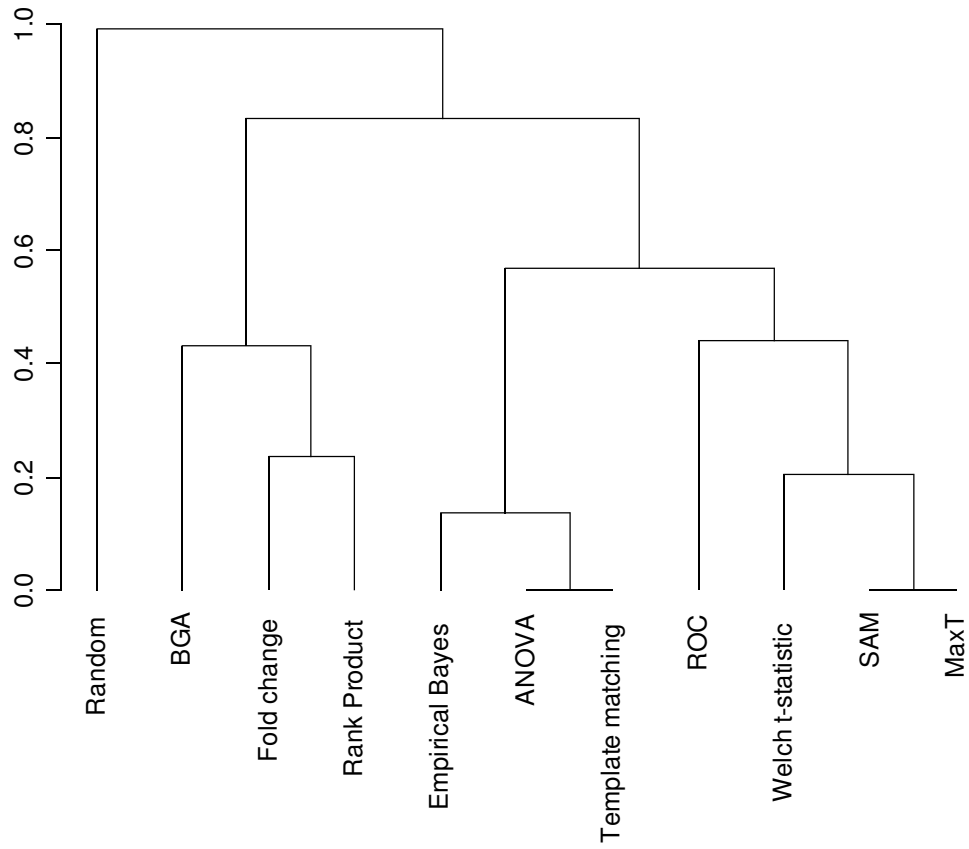

|                   | BGA  | SAM  | ANOVA | Template matching | Welch t-statistic | Fold change | Empirical Bayes | MaxT | ROC  | Rank Product |
|-------------------|------|------|-------|-------------------|-------------------|-------------|-----------------|------|------|--------------|
| BGA               | /    | 26.7 | 26.5  | 26.5              | 26.5              | 73.8        | 29.7            | 26.7 | 24.9 | 71.2         |
| SAM               | 26.7 | /    | 58.9  | 58.9              | 88.6              | 30.4        | 59.6            | 100  | 74.6 | 28.1         |
| ANOVA             | 26.5 | 58.9 | /     | 100               | 48.2              | 30.3        | 92.7            | 58.9 | 71.9 | 29.2         |
| Template matching | 26.5 | 58.9 | 100   | /                 | 48.2              | 30.3        | 92.7            | 58.9 | 71.9 | 29.2         |
| Welch t-statistic | 26.5 | 88.6 | 48.2  | 48.2              | /                 | 30.1        | 49.5            | 88.6 | 65.8 | 27.3         |
| Fold change       | 73.8 | 30.4 | 30.3  | 30.3              | 30.1              | /           | 33.4            | 30.4 | 27.6 | 86.6         |
| Empirical Bayes   | 29.7 | 59.6 | 92.7  | 92.7              | 49.5              | 33.4        | /               | 59.6 | 71.5 | 32           |
| MaxT              | 26.7 | 100  | 58.9  | 58.9              | 88.6              | 30.4        | 59.6            | /    | 74.6 | 28.1         |
| ROC               | 24.9 | 74.6 | 71.9  | 71.9              | 65.8              | 27.6        | 71.5            | 74.6 | /    | 25.6         |
| Rank Product      | 71.2 | 28.1 | 29.2  | 29.2              | 27.3              | 86.6        | 32              | 28.1 | 25.6 | /            |
| Random            | 1.1  | 1    | 1.8   | 1.8               | 1                 | 1.3         | 1.6             | 1    | 1.2  | 1.5          |

### Leukaemia, where n = 50%

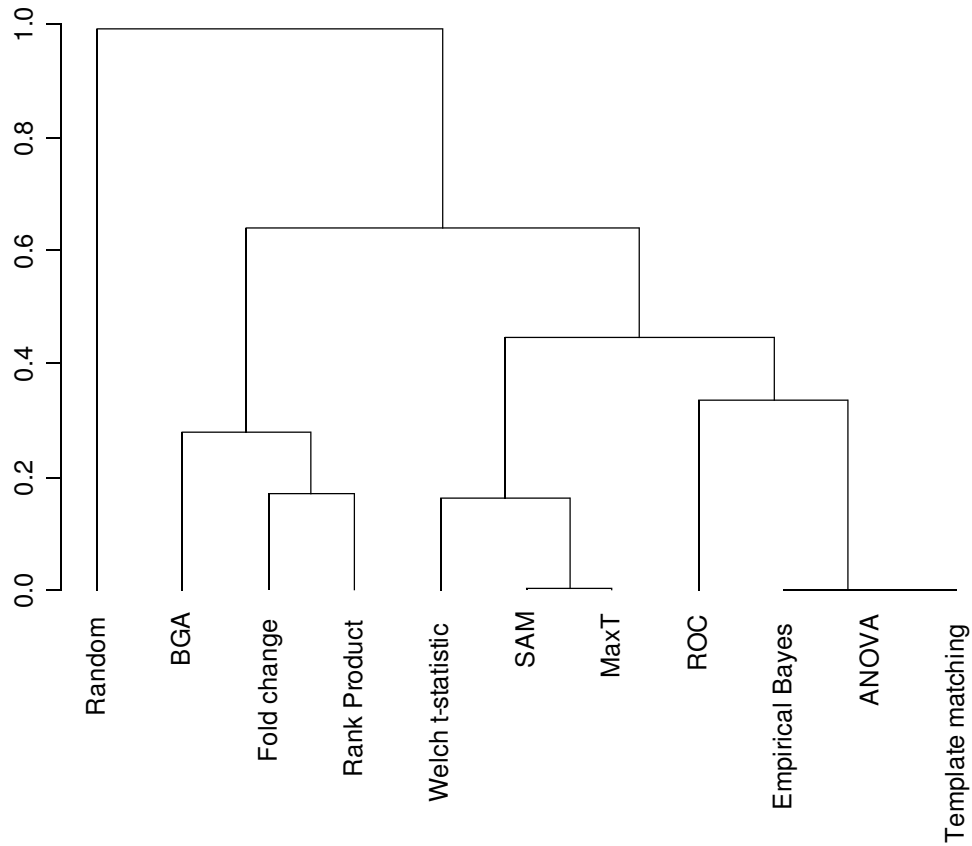

|                   | BGA  | SAM  | ANOVA | Template matching | Welch t-statistic | Fold change | Empirical Bayes | MaxT | ROC  | Rank Product |
|-------------------|------|------|-------|-------------------|-------------------|-------------|-----------------|------|------|--------------|
| BGA               | /    | 49.3 | 54.6  | 54.6              | 44.2              | 85.1        | 54.6            | 49.3 | 46.4 | 82.5         |
| SAM               | 49.3 | /    | 72    | 72                | 91.2              | 53.5        | 72              | 99.8 | 79.3 | 52.1         |
| ANOVA             | 54.6 | 72   | /     | 100               | 63.4              | 59          | 100             | 72   | 79.9 | 56.2         |
| Template matching | 54.6 | 72   | 100   | /                 | 63.4              | 59          | 100             | 72   | 79.9 | 56.2         |
| Welch t-statistic | 44.2 | 91.2 | 63.4  | 63.4              | /                 | 48.6        | 63.4            | 91.2 | 72.8 | 47.2         |
| Fold change       | 85.1 | 53.5 | 59    | 59                | 48.6              | /           | 59              | 53.5 | 52.8 | 90.7         |
| Empirical Bayes   | 54.6 | 72   | 100   | 100               | 63.4              | 59          | /               | 72   | 79.9 | 56.2         |
| MaxT              | 49.3 | 99.8 | 72    | 72                | 91.2              | 53.5        | 72              | /    | 79.2 | 52.1         |
| ROC               | 46.4 | 79.3 | 79.9  | 79.9              | 72.8              | 52.8        | 79.9            | 79.2 | /    | 50.7         |
| Rank Product      | 82.5 | 52.1 | 56.2  | 56.2              | 47.2              | 90.7        | 56.2            | 52.1 | 50.7 | /            |
| Random            | 1.3  | 1.4  | 1.2   | 1.2               | 1.3               | 1.4         | 1.2             | 1.4  | 1    | 1.4          |

### Myeloma, where n = 50%

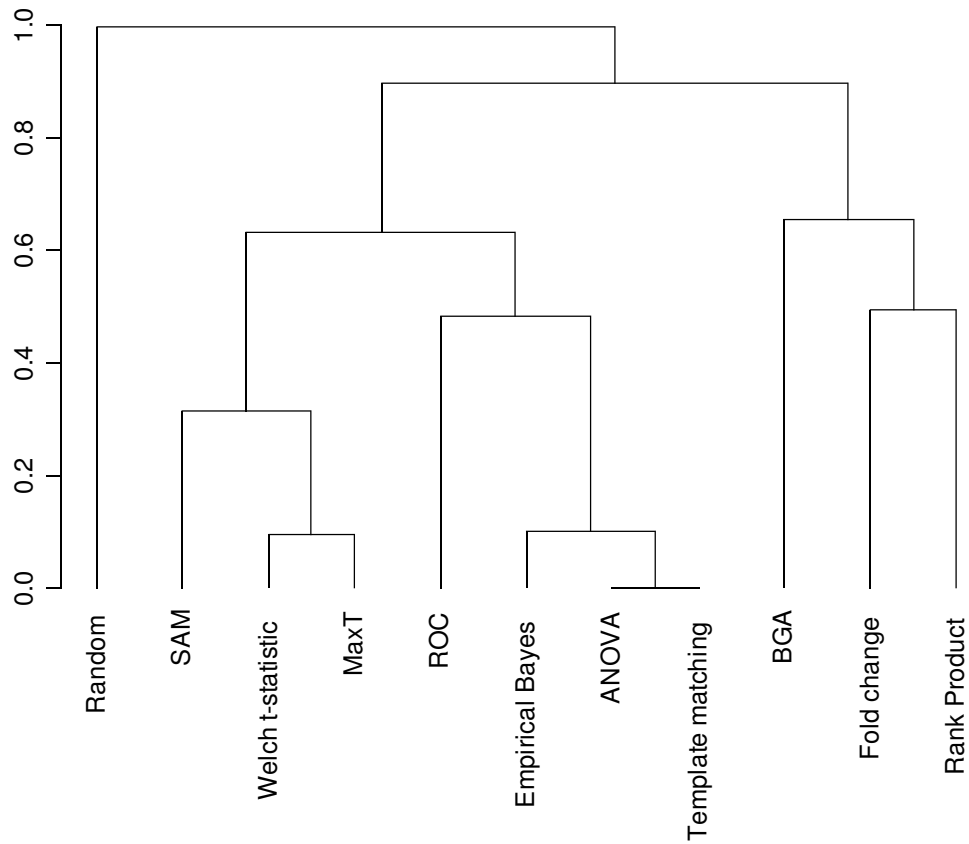

|                   | BGA  | SAM  | ANOVA | Template matching | Welch t-statistic | Fold change | Empirical Bayes | MaxT | ROC  | Rank Product |
|-------------------|------|------|-------|-------------------|-------------------|-------------|-----------------|------|------|--------------|
| BGA               | /    | 23   | 17    | 17                | 15.7              | 56.8        | 19              | 16.3 | 14.4 | 45.6         |
| SAM               | 23   | /    | 52.4  | 52.4              | 80.8              | 31.5        | 53.5            | 82   | 62.1 | 16.8         |
| ANOVA             | 17   | 52.4 | /     | 100               | 48.2              | 26.3        | 94.7            | 52.8 | 68.5 | 12.2         |
| Template matching | 17   | 52.4 | 100   | /                 | 48.2              | 26.3        | 94.7            | 52.8 | 68.5 | 12.2         |
| Welch t-statistic | 15.7 | 80.8 | 48.2  | 48.2              | /                 | 20.3        | 47.6            | 95   | 59.8 | 10.7         |
| Fold change       | 56.8 | 31.5 | 26.3  | 26.3              | 20.3              | /           | 28.5            | 21.6 | 22.7 | 67.1         |
| Empirical Bayes   | 19   | 53.5 | 94.7  | 94.7              | 47.6              | 28.5        | /               | 52.1 | 67.4 | 13.8         |
| MaxT              | 16.3 | 82   | 52.8  | 52.8              | 95                | 21.6        | 52.1            | /    | 63.6 | 11.3         |
| ROC               | 14.4 | 62.1 | 68.5  | 68.5              | 59.8              | 22.7        | 67.4            | 63.6 | /    | 10.7         |
| Rank Product      | 45.6 | 16.8 | 12.2  | 12.2              | 10.7              | 67.1        | 13.8            | 11.3 | 10.7 | /            |
| Random            | 0.5  | 0.4  | 0.8   | 0.8               | 0.4               | 0.9         | 0.7             | 0.4  | 0.4  | 0.9          |



Prostate, where n = 50%

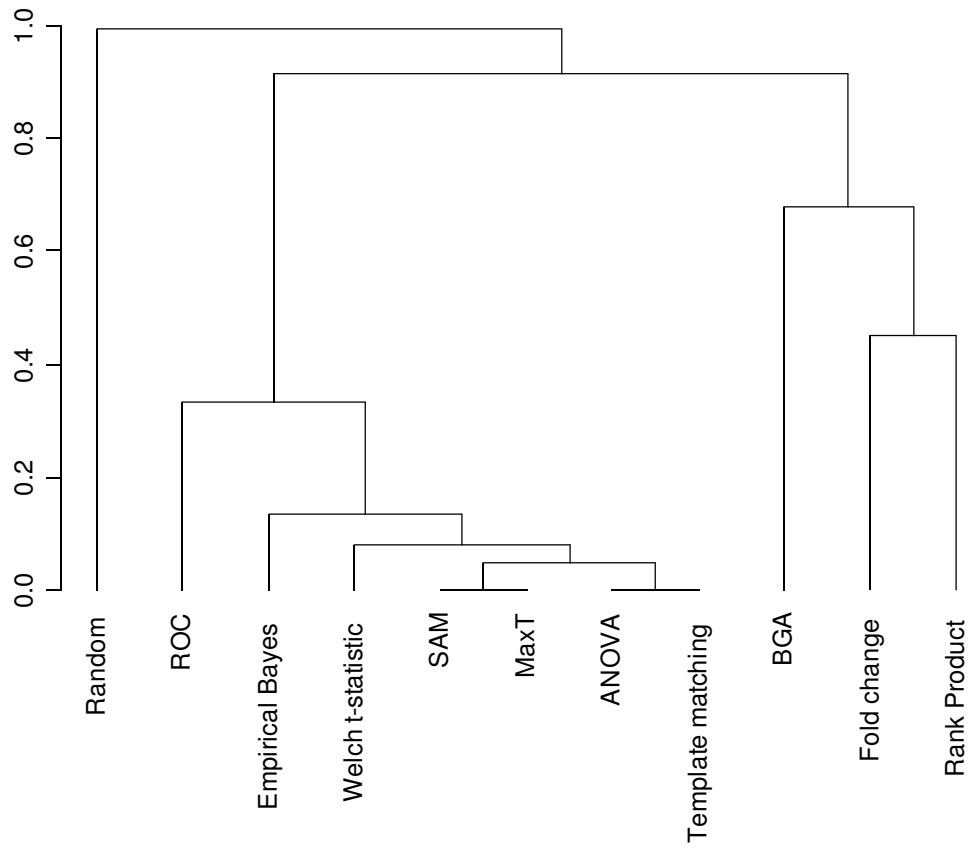

|                   | BGA  | SAM  | ANOVA | Template matching | Welch t-statistic | Fold change | Empirical Bayes | MaxT | ROC  | Rank Product |
|-------------------|------|------|-------|-------------------|-------------------|-------------|-----------------|------|------|--------------|
| BGA               | /    | 18.9 | 19.2  | 19.2              | 17.9              | 47.7        | 20.9            | 18.9 | 19.9 | 49.7         |
| SAM               | 18.9 | /    | 97.5  | 97.5              | 95.8              | 12.7        | 93.5            | 100  | 80.4 | 15.6         |
| ANOVA             | 19.2 | 97.5 | /     | 100               | 95.8              | 12.8        | 93.2            | 97.5 | 80.1 | 15.8         |
| Template matching | 19.2 | 97.5 | 100   | /                 | 95.8              | 12.8        | 93.2            | 97.5 | 80.1 | 15.8         |
| Welch t-statistic | 17.9 | 95.8 | 95.8  | 95.8              | /                 | 12.1        | 90.5            | 95.8 | 79.2 | 14.7         |
| Fold change       | 47.7 | 12.7 | 12.8  | 12.8              | 12.1              | /           | 14              | 12.7 | 12   | 71           |
| Empirical Bayes   | 20.9 | 93.5 | 93.2  | 93.2              | 90.5              | 14          | /               | 93.5 | 79.3 | 17.3         |
| MaxT              | 18.9 | 100  | 97.5  | 97.5              | 95.8              | 12.7        | 93.5            | /    | 80.4 | 15.6         |
| ROC               | 19.9 | 80.4 | 80.1  | 80.1              | 79.2              | 12          | 79.3            | 80.4 | /    | 13.4         |
| Rank Product      | 49.7 | 15.6 | 15.8  | 15.8              | 14.7              | 71          | 17.3            | 15.6 | 13.4 | /            |
| Random            | 1.1  | 1.2  | 1.1   | 1.1               | 1.2               | 0.9         | 1.1             | 1.2  | 1    | 1            |
