# Supplementary material for: Comparison and evaluation of methods for generating differentially expressed gene lists from microarray data
Source: PubMed Central journal article supplement (PMC1544358; doi:10.1186/1471-2105-7-359), 2006-07-26
Supplement: 1471-2105-7-359-S4.pdf [file 1471-2105-7-359-S4.pdf]

### Full ALL1 dataset

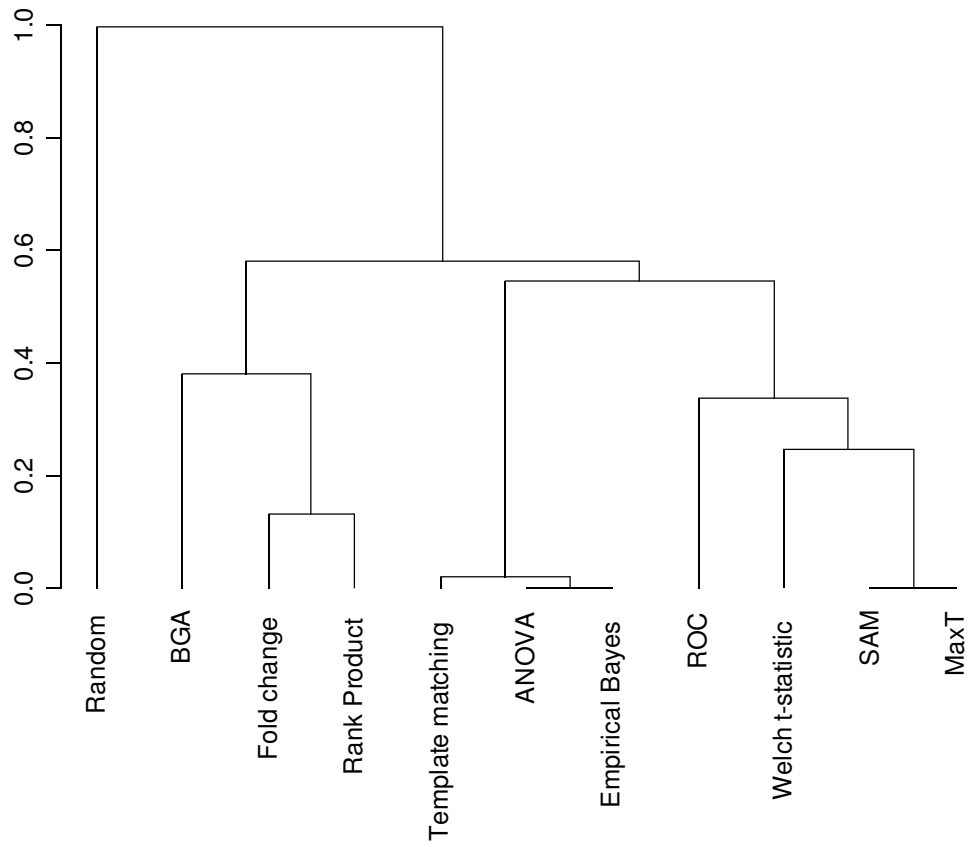

|                   | BGA | SAM | ANOVA | Template matching | Welch t-statistic | Fold change | Empirical Bayes | MaxT | ROC | Rank Product |
|-------------------|-----|-----|-------|-------------------|-------------------|-------------|-----------------|------|-----|--------------|
| BGA               | /   | 56  | 57    | 56                | 49                | 76          | 57              | 56   | 58  | 77           |
| SAM               | 56  | /   | 62    | 61                | 86                | 60          | 62              | 100  | 84  | 62           |
| ANOVA             | 57  | 62  | /     | 99                | 48                | 60          | 100             | 62   | 76  | 64           |
| Template matching | 56  | 61  | 99    | /                 | 47                | 59          | 99              | 61   | 75  | 63           |
| Welch t-statistic | 49  | 86  | 48    | 47                | /                 | 54          | 48              | 86   | 70  | 54           |
| Fold change       | 76  | 60  | 60    | 59                | 54                | /           | 60              | 60   | 62  | 93           |
| Empirical Bayes   | 57  | 62  | 100   | 99                | 48                | 60          | /               | 62   | 76  | 64           |
| MaxT              | 56  | 100 | 62    | 61                | 86                | 60          | 62              | /    | 84  | 62           |
| ROC               | 58  | 84  | 76    | 75                | 70                | 62          | 76              | 84   | /   | 64           |
| Rank Product      | 77  | 62  | 64    | 63                | 54                | 93          | 64              | 62   | 64  | /            |
| Random            | 0   | 0   | 1     | 1                 | 0                 | 0           | 1               | 0    | 0   | 0            |

### Full ALL2 dataset

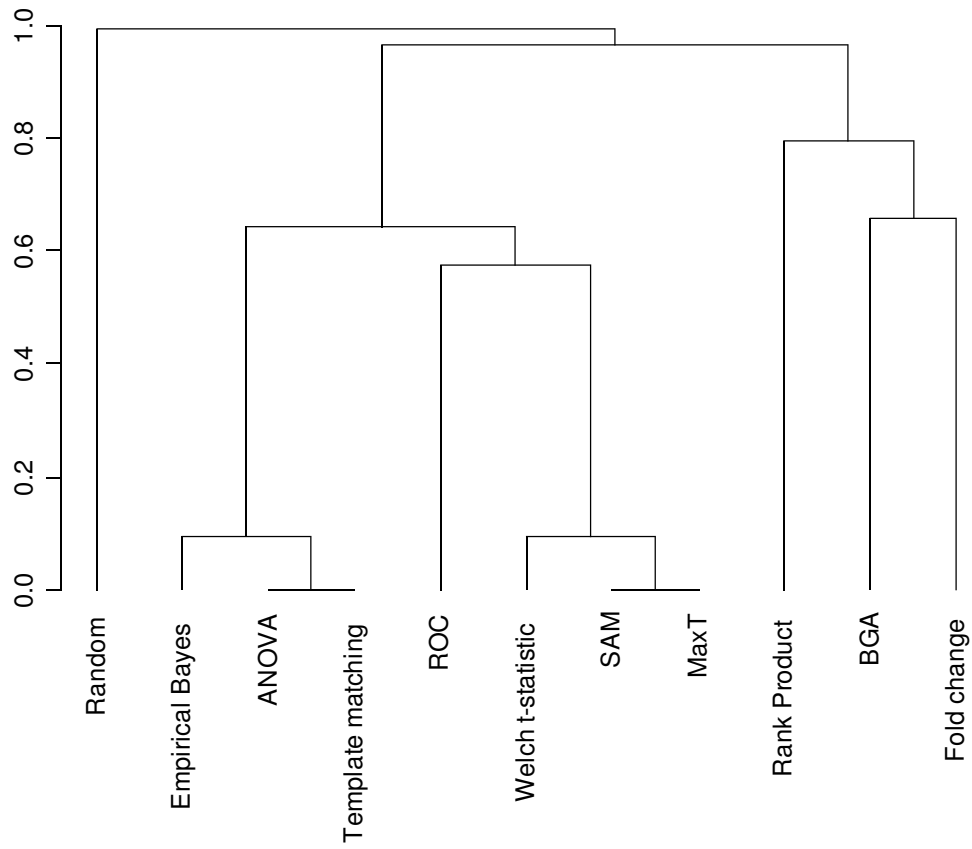

|                   | BGA | SAM | ANOVA | Template matching | Welch t-statistic | Fold change | Empirical Bayes | MaxT | ROC | Rank Product |
|-------------------|-----|-----|-------|-------------------|-------------------|-------------|-----------------|------|-----|--------------|
| BGA               | /   | 10  | 8     | 8                 | 11                | 51          | 10              | 10   | 7   | 28           |
| SAM               | 10  | /   | 53    | 53                | 95                | 12          | 54              | 100  | 61  | 1            |
| ANOVA             | 8   | 53  | /     | 100               | 49                | 8           | 95              | 53   | 54  | 0            |
| Template matching | 8   | 53  | 100   | /                 | 49                | 8           | 95              | 53   | 54  | 0            |
| Welch t-statistic | 11  | 95  | 49    | 49                | /                 | 13          | 51              | 95   | 57  | 1            |
| Fold change       | 51  | 12  | 8     | 8                 | 13                | /           | 10              | 12   | 8   | 40           |
| Empirical Bayes   | 10  | 54  | 95    | 95                | 51                | 10          | /               | 54   | 55  | 0            |
| MaxT              | 10  | 100 | 53    | 53                | 95                | 12          | 54              | /    | 61  | 1            |
| ROC               | 7   | 61  | 54    | 54                | 57                | 8           | 55              | 61   | /   | 0            |
| Rank Product      | 28  | 1   | 0     | 0                 | 1                 | 40          | 0               | 1    | 0   | /            |
| Random            | 1   | 3   | 0     | 0                 | 3                 | 1           | 0               | 3    | 0   | 1            |

### Full ALL3 dataset

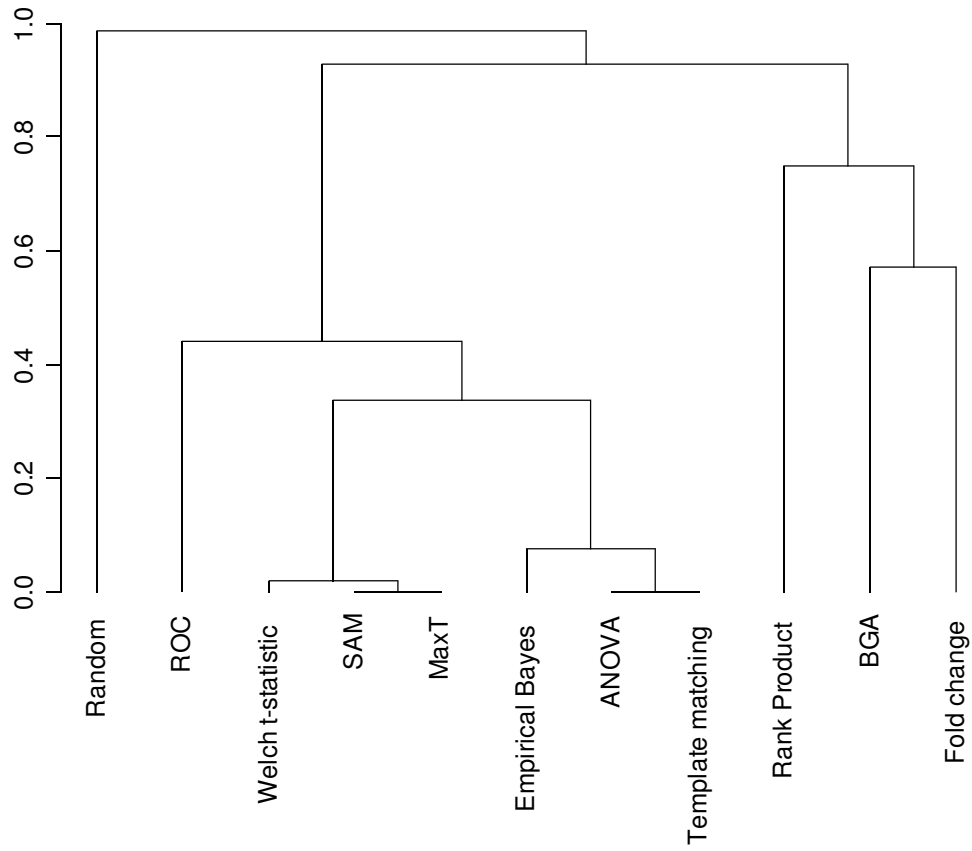

|                   | BGA | SAM | ANOVA | Template matching | Welch t-statistic | Fold change | Empirical Bayes | MaxT | ROC | Rank Product |
|-------------------|-----|-----|-------|-------------------|-------------------|-------------|-----------------|------|-----|--------------|
| BGA               | /   | 18  | 17    | 17                | 17                | 60          | 18              | 18   | 10  | 32           |
| SAM               | 18  | /   | 80    | 80                | 99                | 18          | 80              | 100  | 74  | 5            |
| ANOVA             | 17  | 80  | /     | 100               | 79                | 16          | 96              | 80   | 69  | 7            |
| Template matching | 17  | 80  | 100   | /                 | 79                | 16          | 96              | 80   | 69  | 7            |
| Welch t-statistic | 17  | 99  | 79    | 79                | /                 | 17          | 79              | 99   | 74  | 5            |
| Fold change       | 60  | 18  | 16    | 16                | 17                | /           | 20              | 18   | 14  | 47           |
| Empirical Bayes   | 18  | 80  | 96    | 96                | 79                | 20          | /               | 80   | 70  | 9            |
| MaxT              | 18  | 100 | 80    | 80                | 99                | 18          | 80              | /    | 74  | 5            |
| ROC               | 10  | 74  | 69    | 69                | 74                | 14          | 70              | 74   | /   | 6            |
| Rank Product      | 32  | 5   | 7     | 7                 | 5                 | 47          | 9               | 5    | 6   | /            |
| Random            | 0   | 3   | 3     | 3                 | 3                 | 0           | 3               | 3    | 3   | 1            |

### Full ALL4 dataset

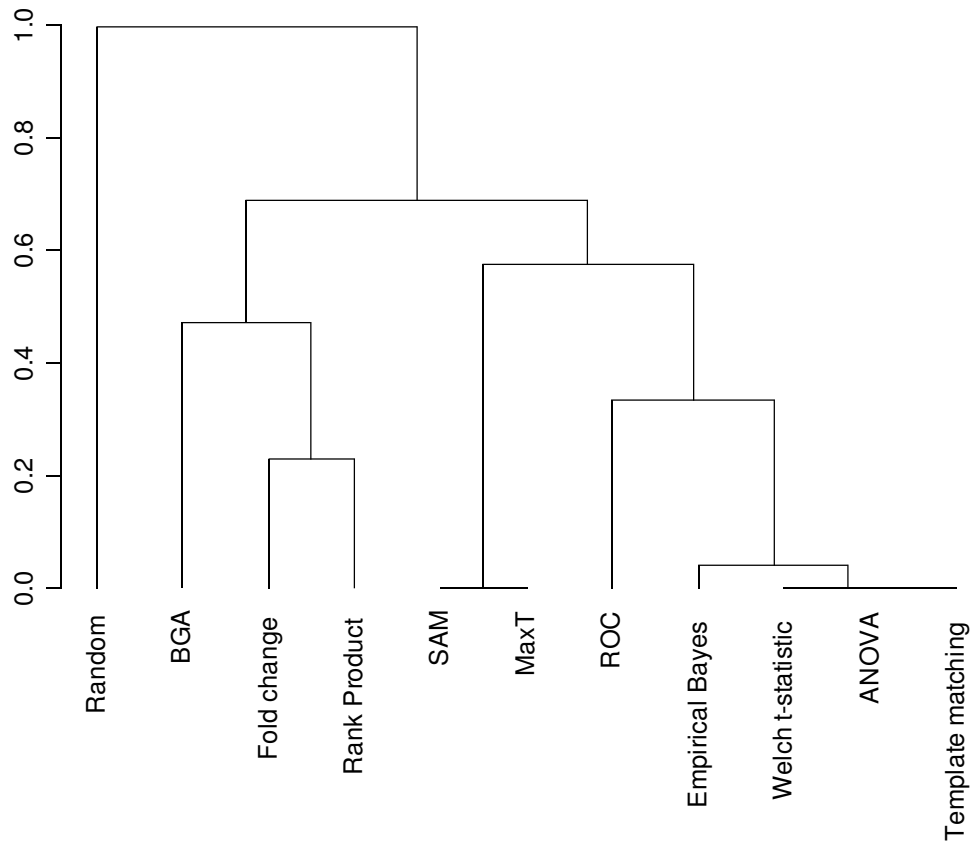

|                   | BGA | SAM | ANOVA | Template matching | Welch t-statistic | Fold change | Empirical Bayes | MaxT | ROC | Rank Product |
|-------------------|-----|-----|-------|-------------------|-------------------|-------------|-----------------|------|-----|--------------|
| BGA               | /   | 47  | 48    | 48                | 48                | 72          | 49              | 47   | 47  | 66           |
| SAM               | 47  | /   | 60    | 60                | 60                | 56          | 60              | 100  | 59  | 51           |
| ANOVA             | 48  | 60  | /     | 100               | 100               | 47          | 98              | 60   | 80  | 43           |
| Template matching | 48  | 60  | 100   | /                 | 100               | 47          | 98              | 60   | 80  | 43           |
| Welch t-statistic | 48  | 60  | 100   | 100               | /                 | 47          | 98              | 60   | 80  | 43           |
| Fold change       | 72  | 56  | 47    | 47                | 47                | /           | 47              | 56   | 45  | 87           |
| Empirical Bayes   | 49  | 60  | 98    | 98                | 98                | 47          | /               | 60   | 80  | 43           |
| MaxT              | 47  | 100 | 60    | 60                | 60                | 56          | 60              | /    | 59  | 51           |
| ROC               | 47  | 59  | 80    | 80                | 80                | 45          | 80              | 59   | /   | 42           |
| Rank Product      | 66  | 51  | 43    | 43                | 43                | 87          | 43              | 51   | 42  | /            |
| Random            | 0   | 1   | 0     | 0                 | 0                 | 1           | 0               | 1    | 0   | 1            |

### Full Colon dataset

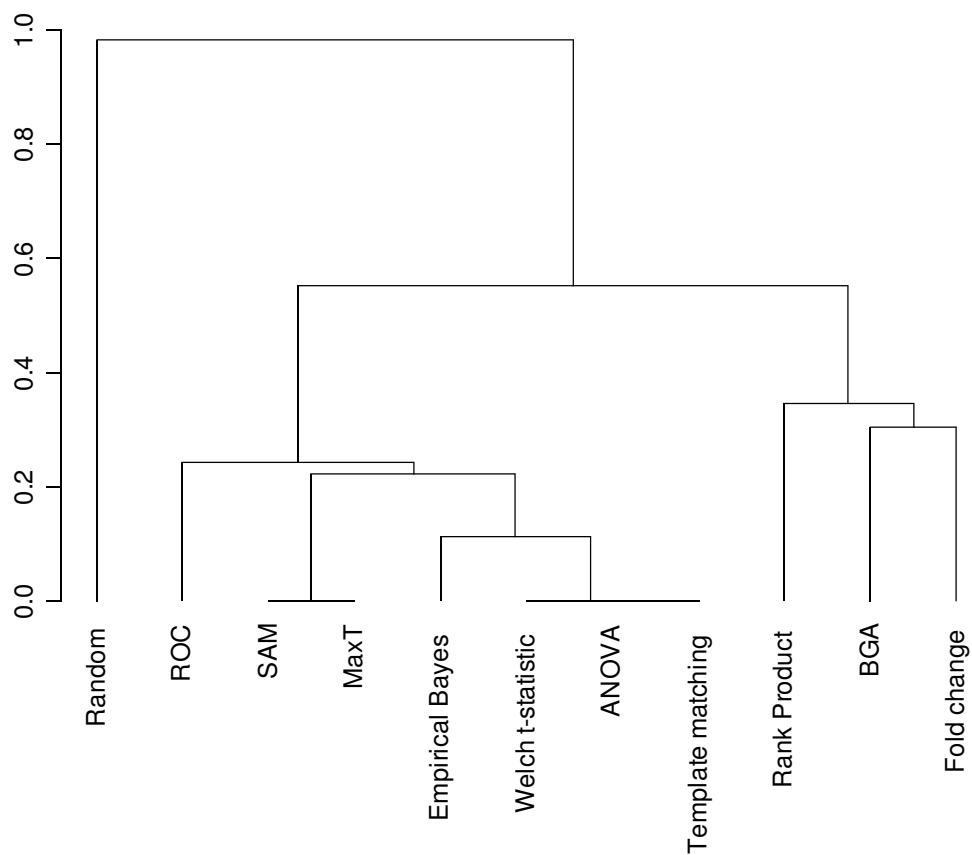

|                   | BGA | SAM | ANOVA | Template matching | Welch t-statistic | Fold change | Empirical Bayes | MaxT | ROC | Rank Product |
|-------------------|-----|-----|-------|-------------------|-------------------|-------------|-----------------|------|-----|--------------|
| BGA               | /   | 61  | 61    | 61                | 61                | 82          | 66              | 61   | 58  | 76           |
| SAM               | 61  | /   | 88    | 88                | 88                | 68          | 86              | 100  | 86  | 53           |
| ANOVA             | 61  | 88  | /     | 100               | 100               | 69          | 94              | 88   | 87  | 55           |
| Template matching | 61  | 88  | 100   | /                 | 100               | 69          | 94              | 88   | 87  | 55           |
| Welch t-statistic | 61  | 88  | 100   | 100               | /                 | 69          | 94              | 88   | 87  | 55           |
| Fold change       | 82  | 68  | 69    | 69                | 69                | /           | 73              | 68   | 67  | 82           |
| Empirical Bayes   | 66  | 86  | 94    | 94                | 94                | 73          | /               | 86   | 84  | 58           |
| MaxT              | 61  | 100 | 88    | 88                | 88                | 68          | 86              | /    | 86  | 53           |
| ROC               | 58  | 86  | 87    | 87                | 87                | 67          | 84              | 86   | /   | 53           |
| Rank Product      | 76  | 53  | 55    | 55                | 55                | 82          | 58              | 53   | 53  | /            |
| Random            | 2   | 3   | 4     | 4                 | 4                 | 2           | 4               | 3    | 4   | 3            |

### Full DLBCL dataset

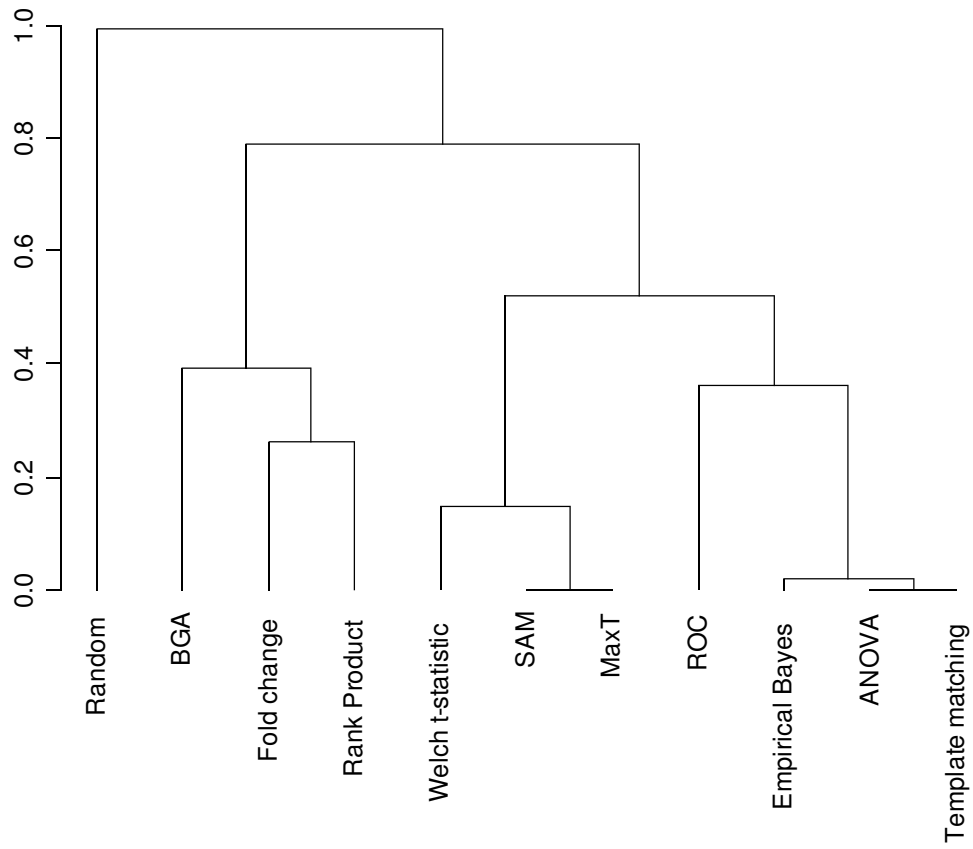

|                   | BGA | SAM | ANOVA | Template matching | Welch t-statistic | Fold change | Empirical Bayes | MaxT | ROC | Rank Product |
|-------------------|-----|-----|-------|-------------------|-------------------|-------------|-----------------|------|-----|--------------|
| BGA               | /   | 30  | 34    | 34                | 29                | 78          | 34              | 30   | 29  | 73           |
| SAM               | 30  | /   | 63    | 63                | 92                | 37          | 63              | 100  | 78  | 31           |
| ANOVA             | 34  | 63  | /     | 100               | 56                | 42          | 99              | 63   | 78  | 36           |
| Template matching | 34  | 63  | 100   | /                 | 56                | 42          | 99              | 63   | 78  | 36           |
| Welch t-statistic | 29  | 92  | 56    | 56                | /                 | 37          | 56              | 92   | 71  | 30           |
| Fold change       | 78  | 37  | 42    | 42                | 37                | /           | 42              | 37   | 38  | 85           |
| Empirical Bayes   | 34  | 63  | 99    | 99                | 56                | 42          | /               | 63   | 78  | 36           |
| MaxT              | 30  | 100 | 63    | 63                | 92                | 37          | 63              | /    | 78  | 31           |
| ROC               | 29  | 78  | 78    | 78                | 71                | 38          | 78              | 78   | /   | 33           |
| Rank Product      | 73  | 31  | 36    | 36                | 30                | 85          | 36              | 31   | 33  | /            |
| Random            | 1   | 0   | 2     | 2                 | 0                 | 2           | 2               | 0    | 1   | 2            |



### Full Myeloma dataset

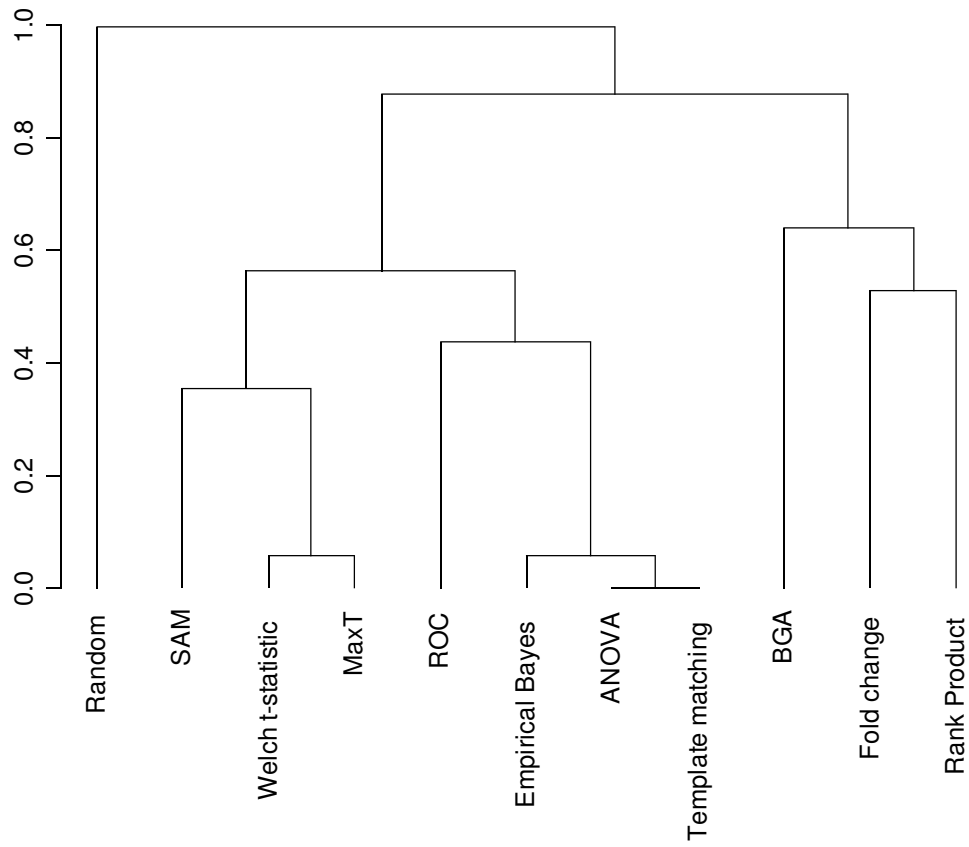

|                   | BGA | SAM | ANOVA | Template matching | Welch t-statistic | Fold change | Empirical Bayes | MaxT | ROC | Rank Product |
|-------------------|-----|-----|-------|-------------------|-------------------|-------------|-----------------|------|-----|--------------|
| BGA               | /   | 25  | 21    | 21                | 15                | 55          | 22              | 15   | 14  | 51           |
| SAM               | 25  | /   | 61    | 61                | 78                | 39          | 64              | 79   | 66  | 22           |
| ANOVA             | 21  | 61  | /     | 100               | 57                | 32          | 97              | 60   | 72  | 17           |
| Template matching | 21  | 61  | 100   | /                 | 57                | 32          | 97              | 60   | 72  | 17           |
| Welch t-statistic | 15  | 78  | 57    | 57                | /                 | 24          | 56              | 97   | 63  | 12           |
| Fold change       | 55  | 39  | 32    | 32                | 24                | /           | 33              | 24   | 25  | 64           |
| Empirical Bayes   | 22  | 64  | 97    | 97                | 56                | 33          | /               | 59   | 72  | 18           |
| MaxT              | 15  | 79  | 60    | 60                | 97                | 24          | 59              | /    | 65  | 12           |
| ROC               | 14  | 66  | 72    | 72                | 63                | 25          | 72              | 65   | /   | 11           |
| Rank Product      | 51  | 22  | 17    | 17                | 12                | 64          | 18              | 12   | 11  | /            |
| Random            | 0   | 1   | 0     | 0                 | 1                 | 1           | 0               | 1    | 0   | 1            |
