# Supplementary material for: Comparison and evaluation of methods for generating differentially expressed gene lists from microarray data
Source: PubMed Central journal article supplement (PMC1544358; doi:10.1186/1471-2105-7-359), 2006-07-26

Split Sample. Training and Test. SVM classifier

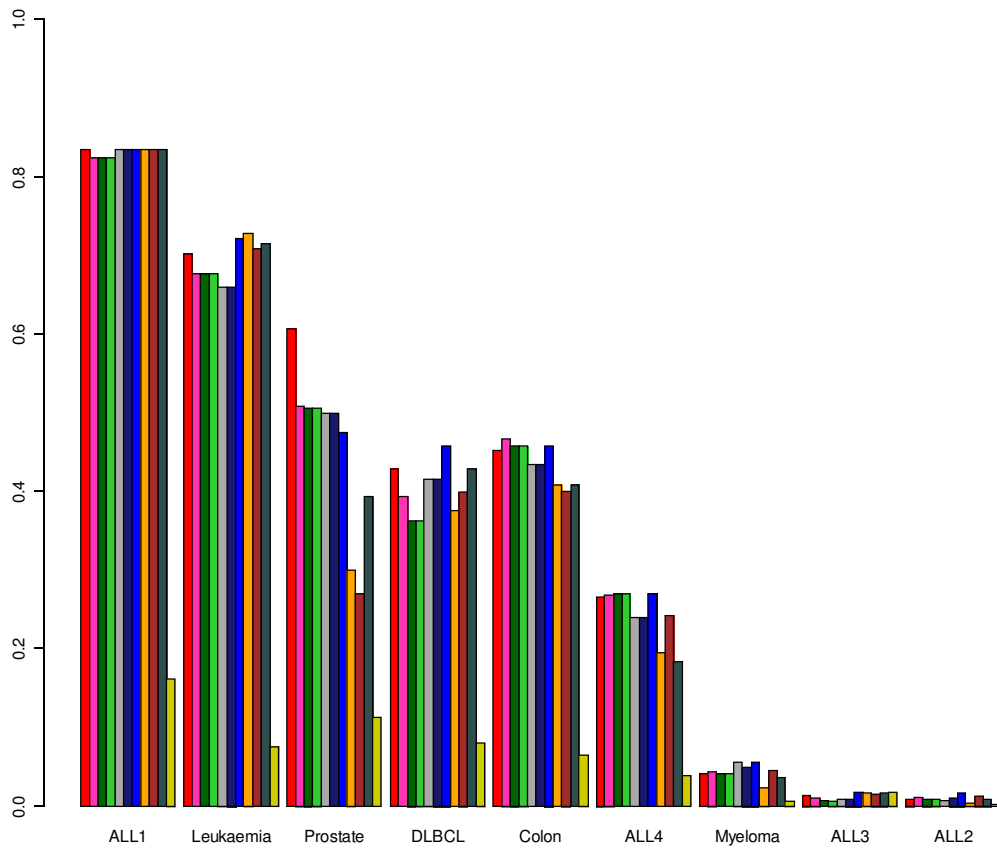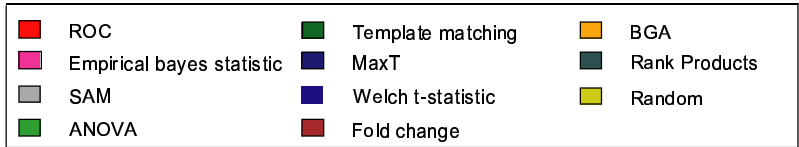

Split Sample. Training and Test. Naive Bayes classifier

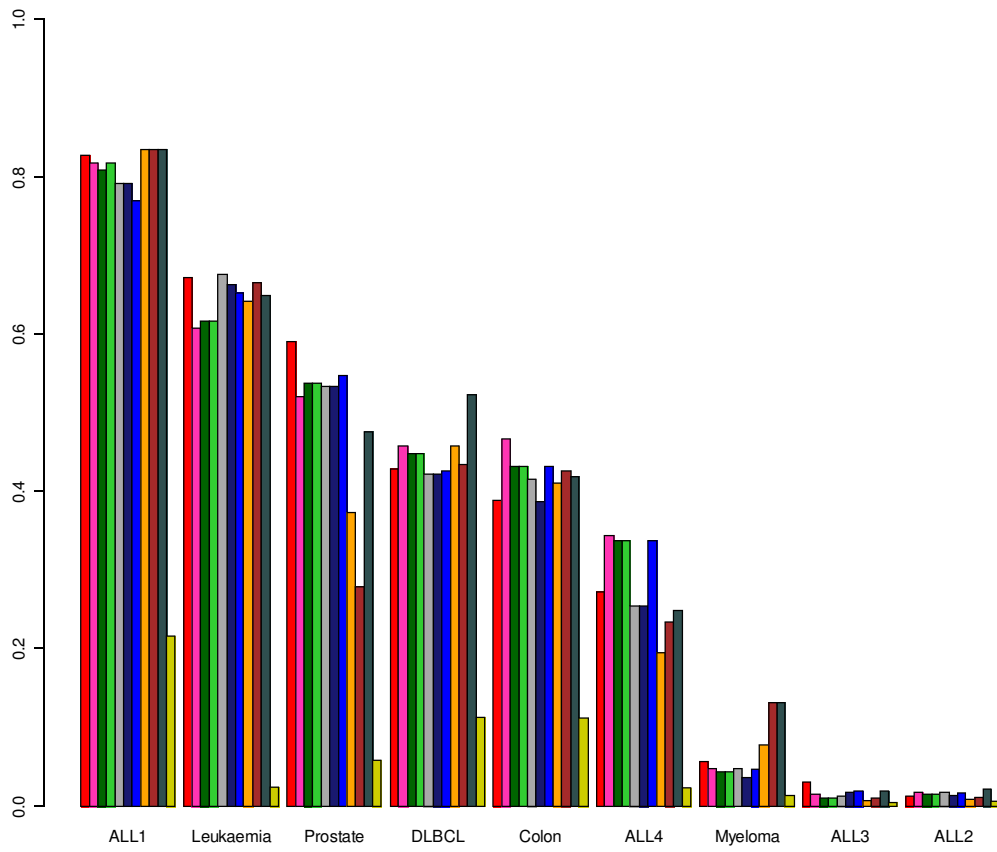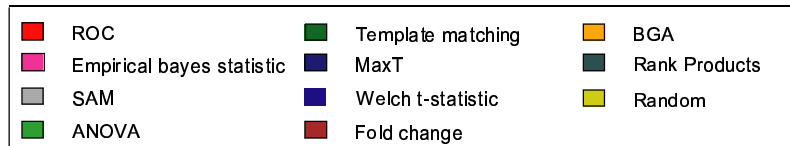

Split Sample. Training and Test. BGA classifier

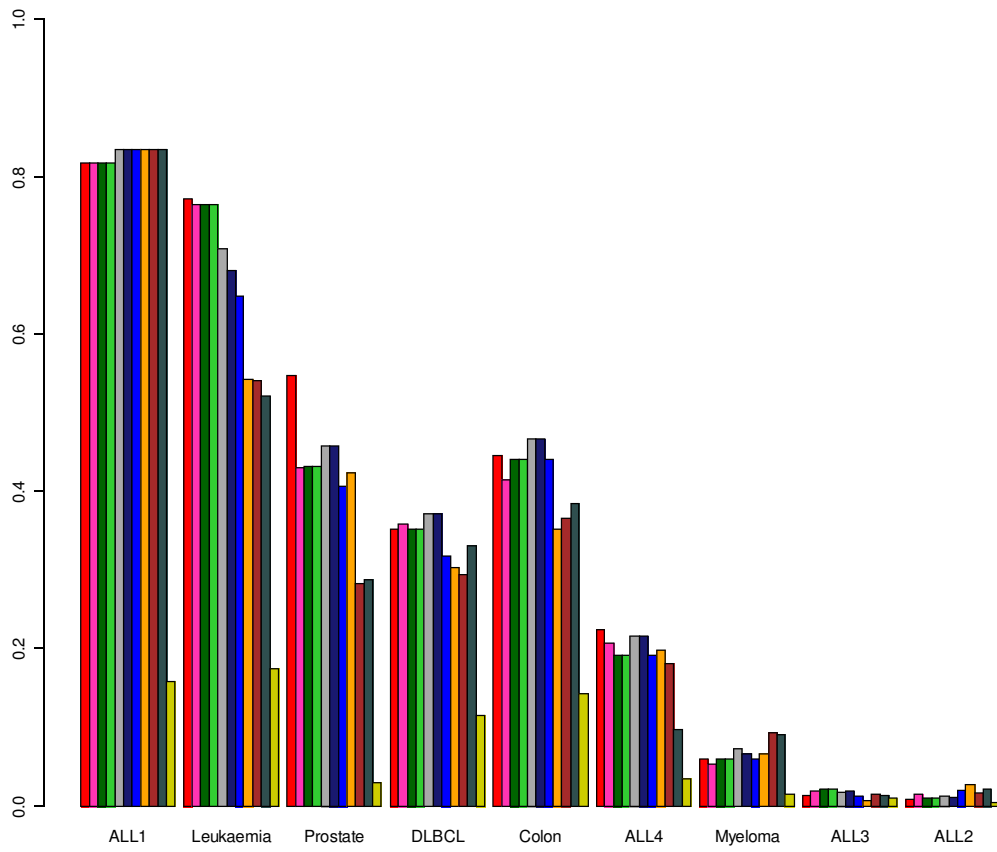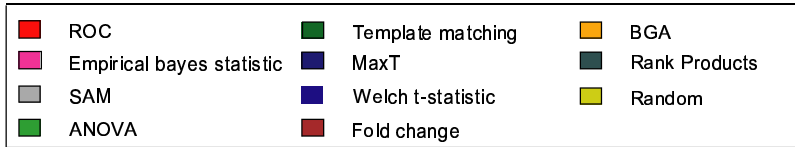

Split Sample. Training and Test. KNN classifier

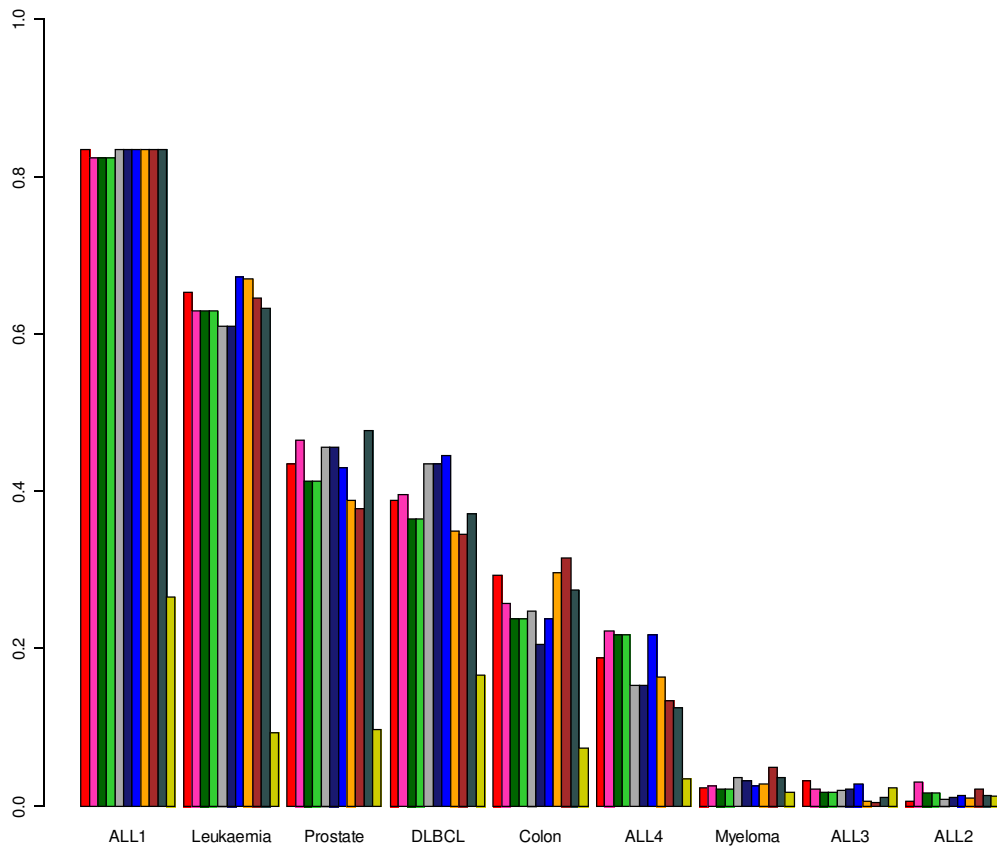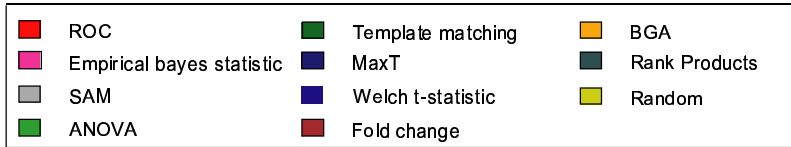

Supplement: 1471-2105-7-359-S13.pdf [file 1471-2105-7-359-S13.pdf]
