# Supplementary material for: Comparison and evaluation of methods for generating differentially expressed gene lists from microarray data
Source: PubMed Central journal article supplement (PMC1544358; doi:10.1186/1471-2105-7-359), 2006-07-26

Reduced Training Set (n=5 per class). SVM classifier

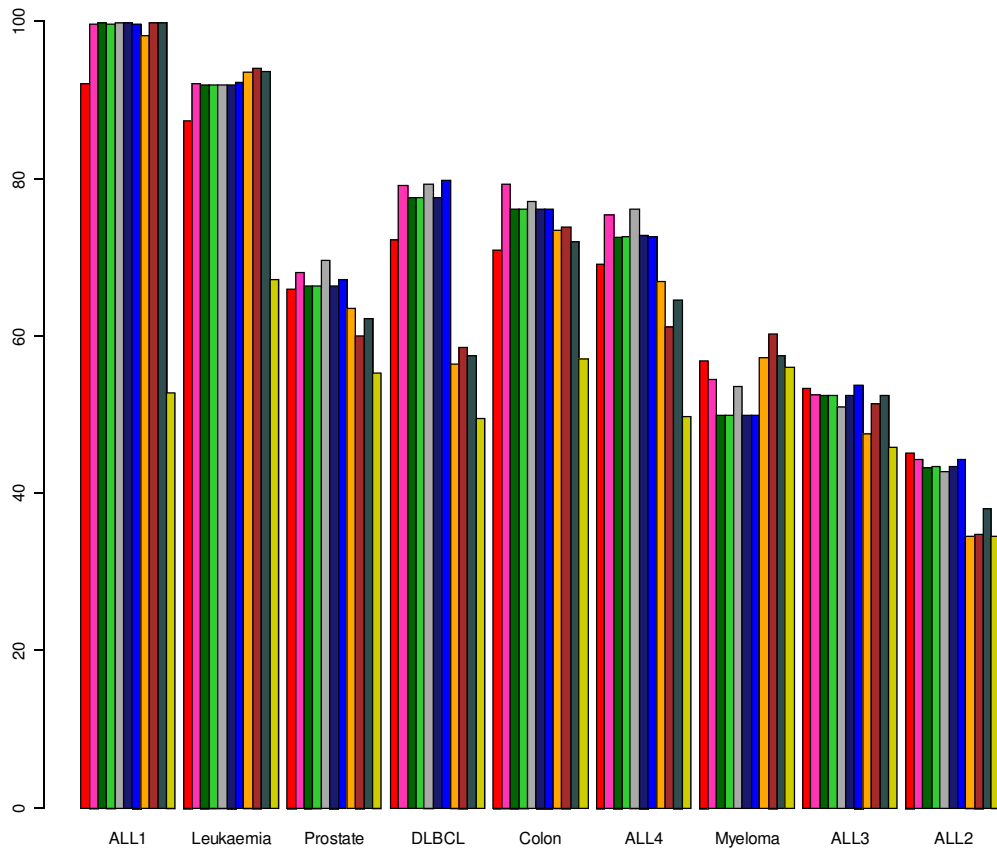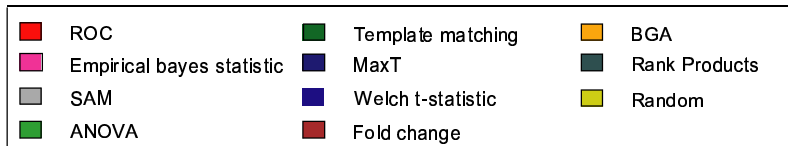

Reduced Training Set (n=5 per class). Naive Bayes classifier

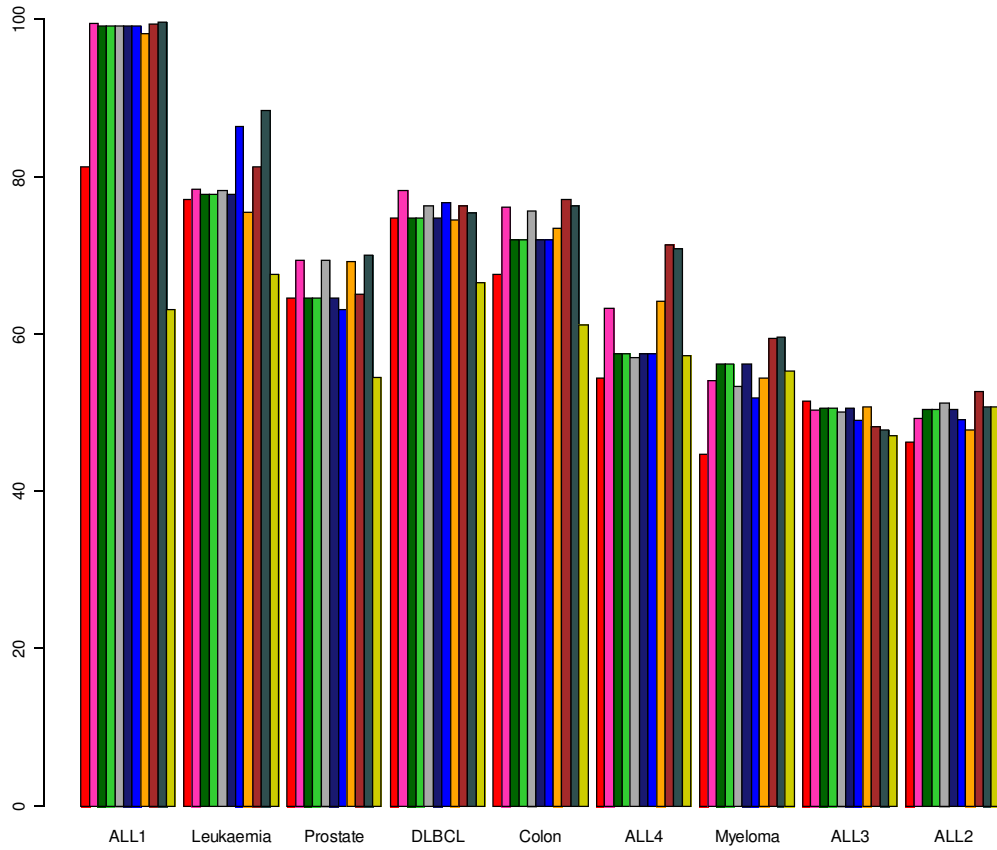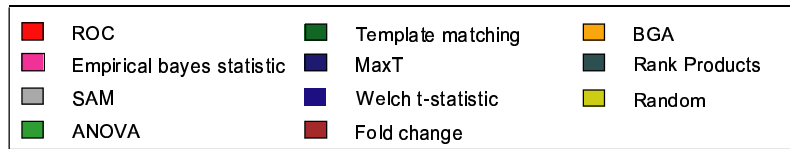

Reduced Training Set (n=5 per class). BGA classifier

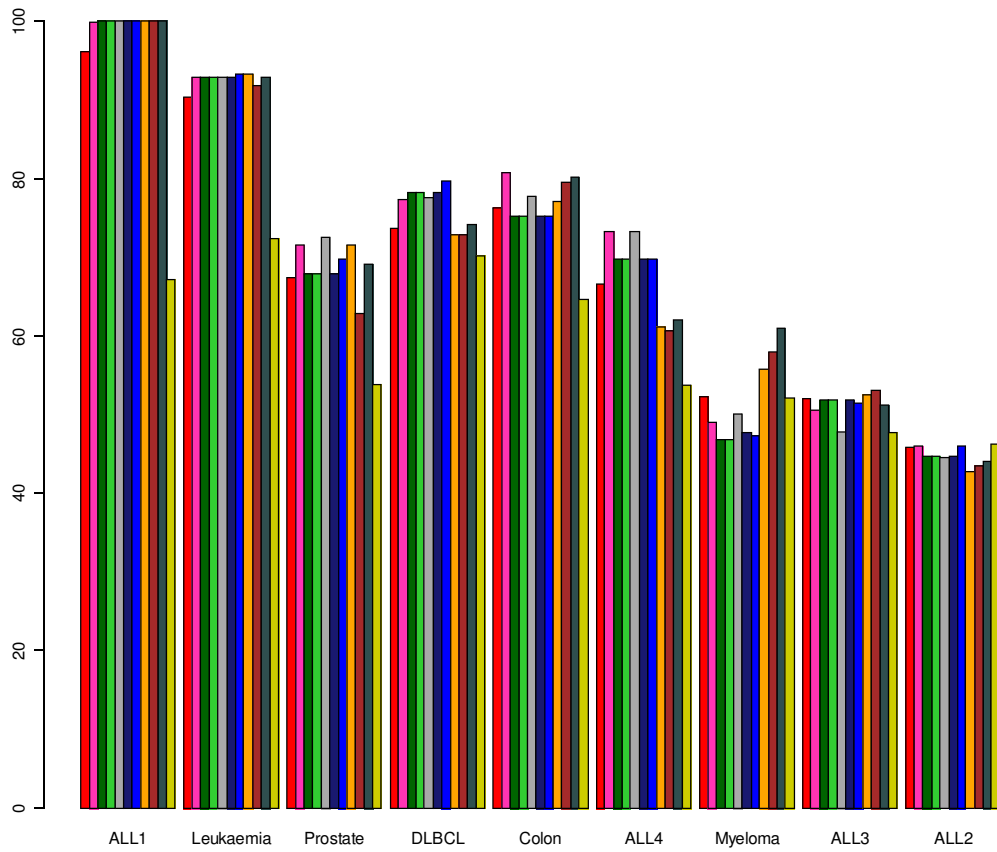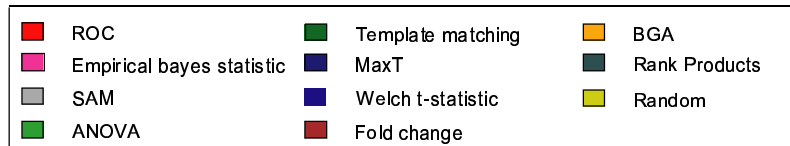

Reduced Training Set (n=5 per class). KNN classifier

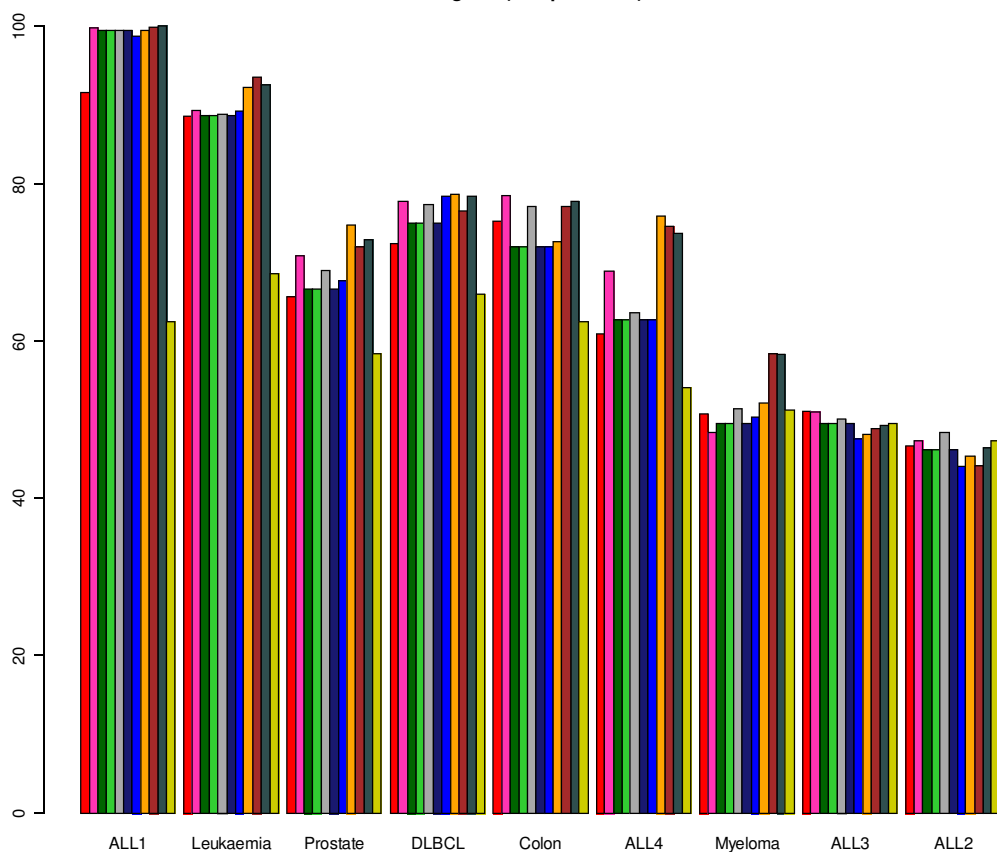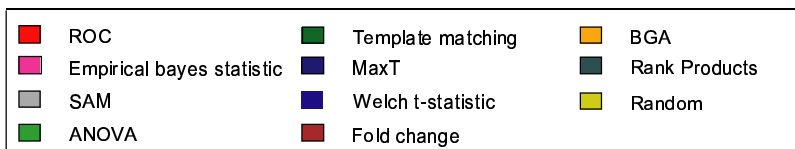

Supplement: 1471-2105-7-359-S20.pdf [file 1471-2105-7-359-S20.pdf]
